# A hippocampus-accumbens code guides goal-directed appetitive behavior

Oliver Barnstedt<sup>1,2</sup>✉, Petra Mocellin<sup>1,3</sup>, and Stefan Remy<sup>1,2,4,5</sup>✉

<sup>1</sup>Department of Cellular Neuroscience, Leibniz Institute for Neurobiology, 39118 Magdeburg, Germany

<sup>2</sup>German Center for Neurodegenerative Diseases (DZNE), 53127 Bonn & 39120 Magdeburg, Germany

<sup>3</sup>International Max Planck Research School for Brain & Behavior (IMPRS), 53175 Bonn, Germany

<sup>4</sup>Center for Behavioral Brain Sciences (CBBS), 39118 Magdeburg, Germany

<sup>5</sup>German Center for Mental Health (DZGP), Magdeburg site, 39106 Magdeburg, Germany

1 **Neurons in dorsal hippocampus (dHPC) encode a rich repertoire of task-relevant environmental features, while downstream regions such as the nucleus accumbens (NAc) translate this information into task-adaptive behaviors. Yet, the contents of this information stream and their acute role in behavior remain largely unknown. Here, we used *in vivo* dual-color two-photon imaging to simultaneously record from both large numbers of hippocampal neurons and an identified subpopulation of NAc-projecting neurons during goal-directed navigation towards a hidden reward zone. We found that NAc-projecting neurons contain enriched spatial information and enhanced representations of non-spatial task-relevant behaviors such as deceleration and appetitive licking, both of which could be elicited by optogenetic activation of dHPC terminals in NAc. A generalized linear model revealed enhanced conjunctive coding in NAc-projecting dHPC neurons, improving the identification of the reward zone. We propose that dHPC routes specific reward-related spatial and behavioral state information to guide NAc action selection.**

19 hippocampus | nucleus accumbens | spatial memory | place cell | reward learning | conjunctive coding | appetitive behavior | calcium imaging

21 Correspondence:

22 [oliver.barnstedt@lin-magdeburg.de](mailto:oliver.barnstedt@lin-magdeburg.de) or [stefan.remy@lin-magdeburg.de](mailto:stefan.remy@lin-magdeburg.de)

## 23 Introduction

24 Memories allow an organism to use past experience to optimize current and future behaviors (1). The hippocampus (HPC) is widely recognized as one of the main sites of memory-related plasticity (2–4). Yet, while our understanding of memory processing within the HPC has greatly advanced, surprisingly little is known about the translation of this information into behavioral action: which hippocampal output pathways send which types of information to guide memory-driven behavior? This lack of knowledge corresponds with the scarcity of data available on the activity profile of large numbers of identified hippocampal projection neurons while animals perform memory-dependent behaviors.

37 The HPC is a major part of the brain’s limbic system, processing various kinds of memory by receiving highly processed sensory information from the entorhinal cortex, and sending behaviorally relevant outputs to diverse brain regions via hippocampal Cornu Ammonis field 1 (CA1) and subiculum (5). Its elevated role for spatial memory is highlighted by the presence of spatially tuned “place cells” that form a “cognitive map” to support goal-directed navigation (6, 7).

45 This cognitive map is further supported by neuronal coding of navigationally relevant features such as borders, speed, reward/goal locations (8–11), but also non-spatial information such as that about future decisions or behavioral tasks (12, 13). The conjunction of this variety of encoded features is suggested to provide a “scaffold” that supports the formation of episodic memories (14).

52 Previous models of hippocampal memory processing assumed largely homogeneous cell populations (15, 16). However, hippocampal principal neurons are increasingly recognized as structurally and functionally diverse in terms of their morphology, electrophysiology, transcriptomic cell types, anatomical differences across its three axes, and projection patterns (17, 18). Such heterogeneity may provide the hippocampus with the intrinsic flexibility to meet the various demands of diverse environments (17), and to route task-relevant information to specific output targets (19, 20).

62 One target receiving strong projections from both dorsal and ventral CA1 and subiculum is the nucleus accumbens (NAc) (21, 22), a basal ganglia brain structure crucial for value-based action selection (23, 24). Described as the “interface between limbic and motor circuitry” (25), it has been suggested as the main site of transformation from a hippocampal spatial code into a motivation-driven motor code (26). In line with this, NAc neurons are spatially tuned, required for spatial memory acquisition and consolidation, and display task-dependent synchrony with dHPC neurons (27–30). Indeed, disabling HPC→NAc projections diminished conditioned place preference (CPP) (31, 32), and optogenetic stimulation was sufficient to artificially induce CPP (33, 34). While these findings cement the NAc’s role as an indispensable hippocampus output node, surprisingly little is known about which spatial, contextual and behavioral patterns of hippocampal information the NAc receives. Here, we set out to understand the specific contents of this information stream during goal-directed navigation and its acute role in behavior. We hypothesized that the HPC may selectively route both spatial as well as other task-relevant information to aid the NAc in action selection.

84 To test this, we employed dual-color two-photon imaging, capturing *in vivo* calcium signals of large populations of neurons in dHPC, while using a projection-specific red fluorophore to allow identification of NAc-projecting neurons (dHPC→NAc). Directly comparing dHPC→NAc activity with

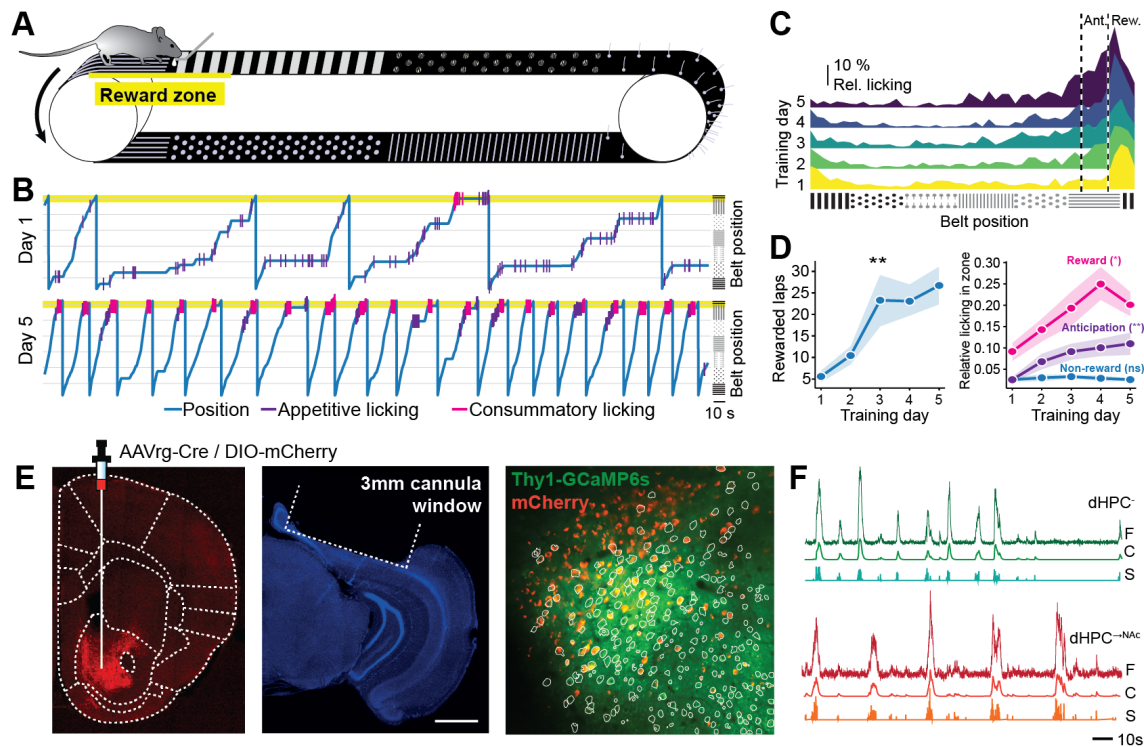

**Figure 1. Dual-color two-photon calcium imaging of dHPC allows projection-specific activity monitoring during goal-directed navigation.** (A-D) Training mice on a spatial reward learning task. (A) Schematic of behavioral task. Mice moved on a cue-enriched self-propelled treadmill belt of 360 cm length and obtained a liquid reward when licking at a spout in a hidden reward zone of 30 cm length (yellow). (B) Representative traces of one mouse's behavior on training day 1 and day 5. (C) Licking in anticipation (Ant.) and reward (Rew.) zone increases over the course of training. (D) Number of rewarded laps per training session ( $F(4) = 6.344$ , GG-correction), anticipatory ( $F(4) = 3.803$ ) and reward licking ( $F(4) = 4.276$ , GG-correction) significantly increased over the course of five training days ( $n = 18$  mice, repeated-measures ANOVA). See also Figure S1. (E) Schematic of dual-color projection neuron imaging method. Thy1-GCaMP6s mice were injected with AAVrg-Cre in the medial NAc and DIO-mCherry in dHPC. Representative coronal brain slice showing axonal mCherry expression in NAc (AP -1.3; left). Representative coronal brain slice stained with DAPI (blue) of dHPC, showing the outlines of the 3 mm cannula window used for imaging; scale bar represents 1 mm (second left). Field of view of one sample experiment showing Thy1-GCaMP6s expression in green and mCherry expression of putative NAc-projecting neurons in red; outlines show detected components used for analysis (right). (F) Two representative neurons' raw ("F"), denoised and deconvolved ("C") and event ("S") traces; red traces indicate mCherry co-expression (dHPC $\rightarrow$ NAc). See also Figure S2. All data are presented as mean  $\pm$  SEM. \* $p < 0.05$ , \*\* $p < 0.01$ .

89 the rest of the dHPC population (dHPC $^-$ ), we found enhanced  
 90 spatial tuning in dHPC $\rightarrow$ NAc neurons, with strong modulation  
 91 by local cue boundaries and a reward zone. We also found  
 92 elevated coding of low velocities and appetitive licking, both  
 93 of which could be elicited by optogenetic stimulation. Lastly,  
 94 we show stronger conjunctive coding of space, velocity, and  
 95 appetitive licking, which improves classification of the re-  
 96 ward zone with a linear decoder. We thus propose that dHPC  
 97 routes reward context-enriched spatial and behavioral state  
 98 information to bias NAc action selection.

## 99 Results

100 **Dual-color calcium imaging during goal-directed navigation.** To investigate coding of spatial information and  
 101 goal-directed behavior in dHPC $\rightarrow$ NAc neurons, we trained  
 102 food-restricted mice on a head-fixed spatial reward learning  
 103 task. Mice had to run on a self-propelled treadmill, traversing  
 104 a 360 cm long textile belt with six differently textured zones,  
 105 including one otherwise unmarked 30 cm long fixed reward  
 106 zone (35, 36). Licking a spout in this zone causes a liquid  
 107 reward to be dispensed once per lap (Figure 1A and Figure  
 108 S1A-E). Mice underwent five days of training in which they  
 109 learned to obtain more rewards by progressively increasing  
 110

their licking in both reward zone and a 30 cm “anticipation  
 111 zone” preceding the reward zone (Figure 1B-D and Figure  
 112 S1F-N).  
 113

To understand the neural coding properties of large numbers  
 114 of dHPC $\rightarrow$ NAc neurons in behaving animals, we turned to  
 115 dual-color two-photon imaging in mice pan-neuronally ex-  
 116 pressing the calcium indicator GCaMP6s, as well as the static  
 117 red marker mCherry in defined NAc-projecting neurons. For  
 118 this, we injected AAVrg-Cre in NAc and DIO-mCherry in  
 119 dHPC (CA1/subiculum border region) of Thy1-GCaMP6s  
 120 mice (37). This approach allowed us to obtain dynamic cal-  
 121 cium signals both in a large majority of mCherry-negative  
 122 hippocampal neurons (dHPC $^-$ ) and specifically mCherry co-  
 123 expressing NAc-projecting neurons (dHPC $\rightarrow$ NAc), simultane-  
 124 ously within the same field of view using the same calcium  
 125 indicator (Figure 1E and Figure S2). It allowed us to over-  
 126 come constraints of electrophysiological studies such as rela-  
 127 tively low sample sizes (19, 20) or indirect connectivity mea-  
 128 surements (38, 39). Optical access to dorsal CA1 and pro-  
 129 subiculum (also known as proximal subiculum (40, 41)) was  
 130 established by implanting a chronic hippocampal window af-  
 131 ter virus injections (Figure S1C) (42, 43). Imaging data was  
 132 acquired after 5 days of behavioral training, was motion-  
 133 corrected using NormCorre, and spatio-temporal components  
 134

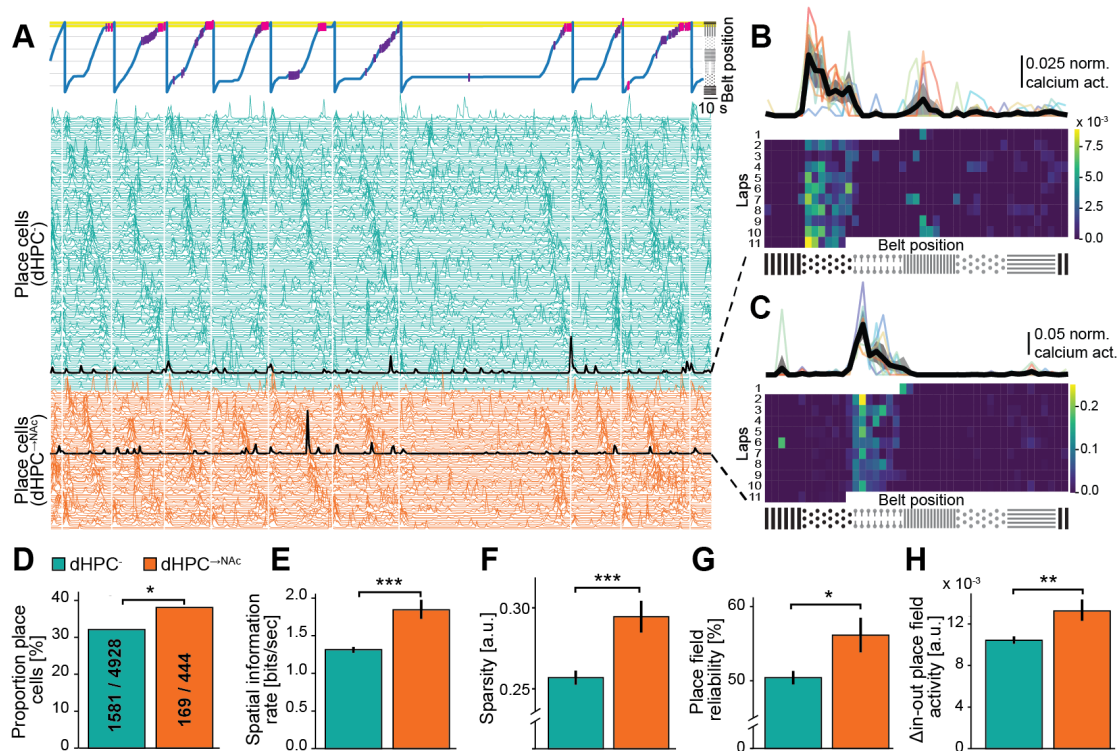

**Figure 2. dHPC<sup>→NAc</sup> neurons carry enhanced and more reliable spatial information.** (A) Excerpt from one representative recording session showing behavioral activity (top) and denoised neural activity of identified place cells (bottom) over the course of several minutes from one mouse. White vertical lines mark new laps. Traces are ordered according to whether neurons co-expressed mCherry (red; dHPC<sup>→NAc</sup>) or not (green; dHPC<sup>-</sup>) and their respective place fields. Black traces are example neurons shown in (B and C). (B and C) Spatial activity of one neuron without (B) and with (C) mCherry co-expression over one session. Calcium events are binned by position on the belt (x axis) and laps (y axis) and show consistent activity at one position on the belt. (D-H) Comparisons of spatial tuning characteristics between dHPC<sup>-</sup> (green) and dHPC<sup>→NAc</sup> (red) neurons. NAc-projecting neurons contain a higher proportion of place cells (D,  $\chi^2(1, 5372) = 6.364$ ); these place cells contain more spatial information per second (E, Welch's  $t(186.55) = 4.770$ ), show increased sparsity (F, Welch's  $t(218.79) = 3.657$ ), higher reliability (G, probability of firing maximally within their place field per lap; Welch's  $t(203.46) = 2.479$ ), and higher in-place field activity (H, Welch's  $t(190.32) = 2.884$ ).  $n = 6$  mice, 19 imaging sessions, 5,372 (inc. 444 mCherry-coexpressing) neurons, 1,750 (inc. 169 mCherry-coexpressing) place cells. \* $p < 0.05$ , \*\* $p < 0.01$ , \*\*\* $p < 0.001$ . See also Figure S3.

135 were extracted using constrained non-negative matrix factorization (CNMF) (44). We thus obtained calcium signals for further analysis from a total of 5,372 GCaMP-expressing neurons including 444 putative dHPC<sup>→NAc</sup> neurons in 6 mice across 19 imaging sessions (Figure 1F and Figures S2 and S3). These numbers approximate previously established proportions of NAc-projecting neurons in dorsal prosubiculum and distal CA1 (20, 45, 46).

143 **Enhanced spatial coding by dHPC<sup>→NAc</sup> neurons.** Given the dHPC's well-established role in representing spatial information and the role of dHPC<sup>→NAc</sup> projections in spatial memory tasks (31, 32), we wondered if and how spatial information may be encoded by dHPC<sup>→NAc</sup> neurons compared to dHPC<sup>-</sup> neurons. For this, we extracted calcium events for each neuron and compared this activity across the linear spatial environment of the treadmill belt as mice traversed it lap by lap. Indeed, we found large numbers of both dHPC<sup>-</sup> and dHPC<sup>→NAc</sup> neurons with repeatedly elevated calcium levels on the same positions of the belt (Figure 2A-C and Figure S3). Comparing each neuron's spatial information content (47) with that of a randomly shuffled distribution, we identified a significantly higher proportion of such place cells in dHPC<sup>→NAc</sup> neurons (169/444 neurons; 38 %) compared to dHPC<sup>-</sup> neurons (1,581/4,928 neurons; 32 %;  $\chi^2, p = 0.012$ ;

Figure 2D). Within this population of place cells, we further analyzed how specifically space is encoded, and found that dHPC<sup>→NAc</sup> place cells had a higher spatial information rate (47) ( $p < 0.001$ , Welch's  $t$ -test; Figure 2E). They also had significantly higher levels of sparsity ( $p < 0.001$ , Welch's  $t$ -test; Figure 2F), a measure for how diffuse a neuron is firing in the spatial domain (48). Furthermore, both the relative calcium activity (activity inside the place field – activity outside the place field;  $p = 0.0044$ , Welch's  $t$ -test) and reliability of in-place field activity per lap ( $p = 0.014$ , Welch's  $t$ -test) were significantly higher for dHPC<sup>→NAc</sup> place cells compared to dHPC<sup>-</sup> neurons (Figure 2G-H). These results suggest that the dHPC routes enhanced and more reliable spatial information to NAc compared to the general dHPC population, in line with previous results pointing towards the necessity of dHPC<sup>→NAc</sup> projections for spatial memory expression (31, 32).

**Place fields are modulated by local cue boundaries and are overrepresented near the reward zone.** Previous studies found that place fields are often not homogeneously distributed across the environment but can be modulated by salient environmental features such as textures, borders, or reward/goal zones (11, 49, 50). We hypothesized that information about such spatial features may be preferen-

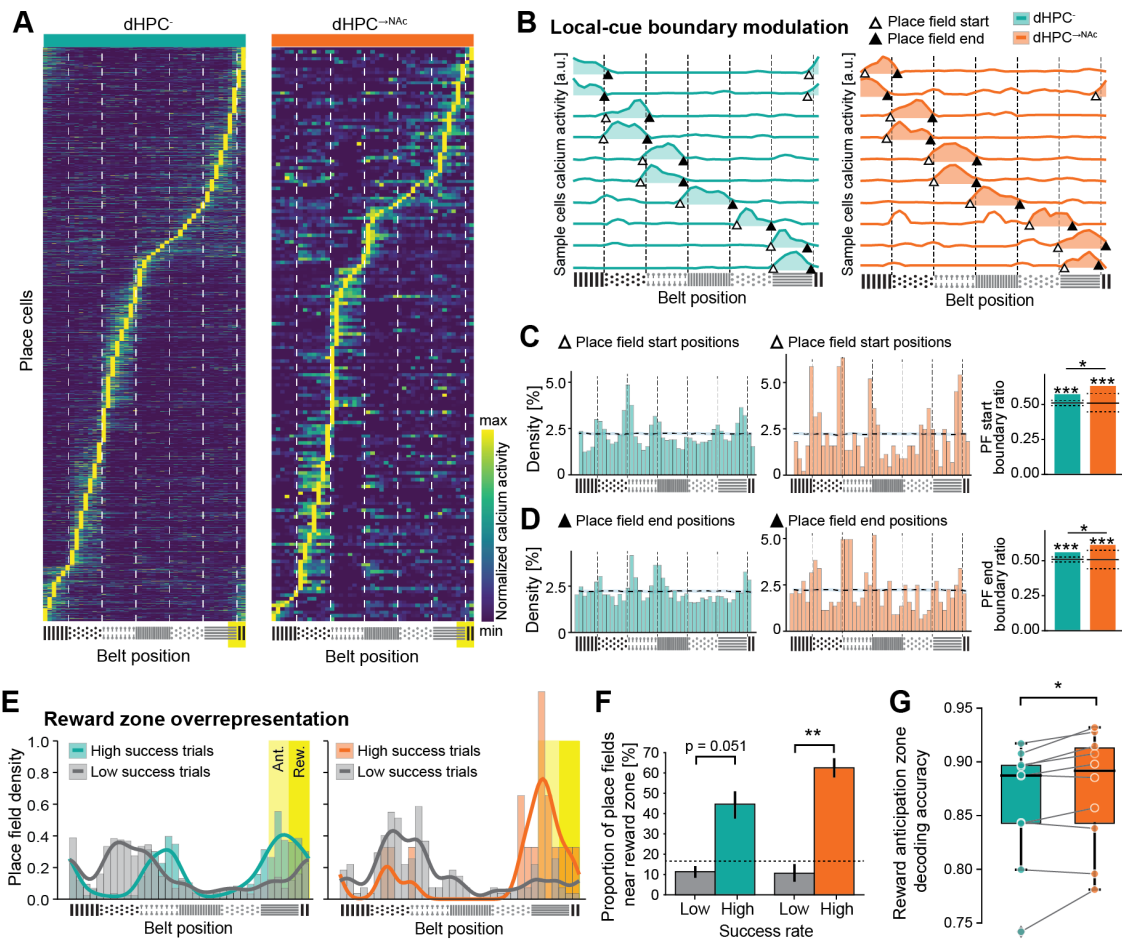

**Figure 3. dHPC<sup>→</sup>NAc place fields are modulated by local cues and reward zone.** (A) Heat maps of dHPC<sup>-</sup> (left) and dHPC<sup>→</sup>NAc (right) place cells' normalized position-binned average calcium events, ordered by place field location. Texture boundaries are indicated as white dashed lines. Yellow rectangle represents reward zone. (B) Example place fields with edges near belt texture boundaries. Primary place fields are indicated by color fill. Triangles mark start (no fill) and end (fill) points. Dashed black lines represent texture boundaries. (C and D) Place field edges accumulate near texture boundary areas. Histograms of dHPC<sup>-</sup> (green) and dHPC<sup>→</sup>NAc (red) neurons' place field start (C) and end (D). Dotted line and shade represent average and 95th CI of 1000x randomly shuffled place fields. Both dHPC<sup>-</sup> and dHPC<sup>→</sup>NAc place field start and end positions are significantly overrepresented at the 99.9th percentile (dotted black lines) compared to a randomly shuffled distribution. Start ( $\chi^2(1, 5134) = 5.735$ ) and end positions ( $\chi^2(1, 5217) = 4.397$ ) of dHPC<sup>→</sup>NAc place fields are furthermore significantly overrepresented compared to the dHPC<sup>-</sup> population. (E and F) Place cells are overrepresented near reward zone in high success trials. (E) Histograms (bars) and kernel density estimations (KDEs; lines) of place field centers for dHPC<sup>-</sup> (left) and dHPC<sup>→</sup>NAc (right) neurons, split into high success trials (green/red) and low success trials (gray). Reward zone (Rew.; yellow) and anticipation zone (Ant.; bright yellow) are indicated as rectangles. (F) Proportion of place fields in reward and vicinity zone is significantly higher in high-success trials (colored bars) compared to low-success trials (gray bars) in NAc-projecting neurons (red) but not in dHPC<sup>-</sup> neurons (green). 2-way ANOVA,  $F_{\text{success}}(1,1) = 54.918, p < 0.001, F_{\text{projection}}(1,1) = 0.958, p = 0.338, F_{\text{interaction}}(1,1) = 2.969, p = 0.098$ . Post-hoc Welch's *t*-tests with Bonferroni correction:  $t_{\text{dHPC}^-}(3.561) = 3.698; t_{\text{dHPC}^{\rightarrow\text{NAc}}}(3.479) = 8.671; t_{\text{low success}}(13.629) = 0.093, p = 1; t_{\text{high success}}(3.952) = 2.075, p = 0.215$ . Dashed line represents an even distribution of reward and anticipation zone. (G) A linear classifier shows significantly increased decoding accuracy of reward anticipation zone based on dHPC<sup>→</sup>NAc neural activity compared to that of sample size-matched dHPC<sup>-</sup> neurons. Wilcoxon's *t*-test,  $W(9) = 5.0, n = 10$  imaging sessions. All data are presented as mean  $\pm$  SEM. \* $p < 0.05, **p < 0.01, ***p < 0.001$ . See also Figure S4.

183 tially routed to NAc, given the relevance of NAc for spatial  
184 memory (29, 30) and particularly for reward-related behav-  
185 iors (51).

186 Upon inspection of place cells' spatially binned calcium pro-  
187 files (Figure 3A-B and Figures S3, S4A), we noticed an over-  
188 abundance of place fields that seemed to cover entire texture  
189 zones, starting at the beginning of a texture zone and end-  
190 ing before the next texture zone began. To quantify this ob-  
191 servation, we plotted the densities of place field start and  
192 end positions across the belt and compared the observed  
193 densities with those of randomly shuffled place fields. We  
194 found a significant overrepresentation of place field start and  
195 end positions (but not centers) near texture boundaries for  
196 both dHPC<sup>-</sup> and dHPC<sup>→</sup>NAc populations (ratios >99.9th per-

centile, permutation test). This effect was more pronounced  
197 in dHPC<sup>→</sup>NAc neurons (PF start:  $p = 0.033$ , PF end:  $p =$   
198  $0.036, \chi^2$ ; Figure 3C-D and Figure S4A-C). This suggests  
199 that dHPC<sup>→</sup>NAc neurons are more strongly modulated by local  
200 cue boundaries.  
201

202 Mice were trained to lick for reward in a hidden reward  
203 zone. Previous studies have shown that such zones and their  
204 preceding vicinity are often over-represented by place cells  
205 (35, 52, 53) – we hypothesized that this effect might involve  
206 dHPC<sup>→</sup>NAc neurons, given the NAc's role in reward-related  
207 behaviors (51). When pooled across all sessions, we found  
208 little evidence of such an overrepresentation (Figure S4D-  
209 E). Mouse behavior generally shows great variability though,  
210 and previous work demonstrated the dependence of such an

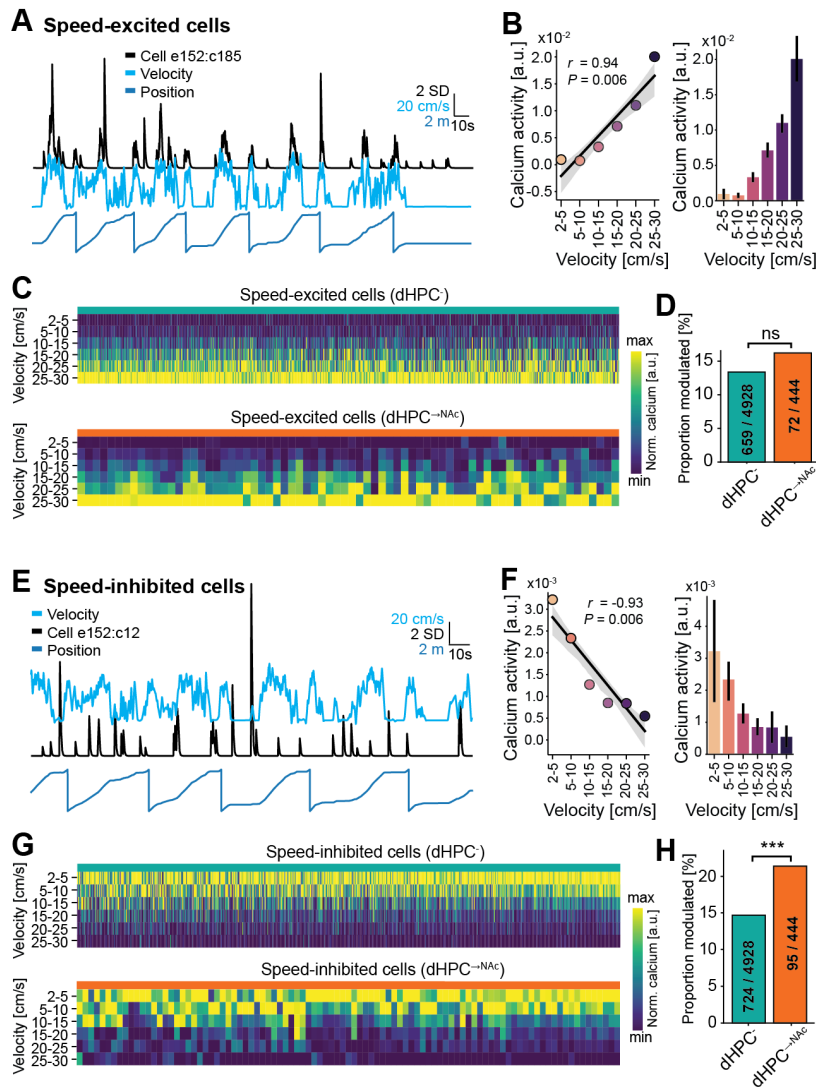

**Figure 4. Speed-inhibited cells are overrepresented in dHPC $\rightarrow$ NAc neurons.** (A-D) Speed-excited dHPC neurons. (A and B) Representative example of one speed-excited neuron. (A) Sample traces of velocity, position and one neuron's denoised calcium activity. Note the increased calcium activity in times of high velocity, irrespective of position. (B) Linear regression on average calcium events per velocity bin shows a significant positive relationship (slope =  $7.43 \times 10^{-4}$ , intercept =  $-2.097 \times 10^{-3}$ ,  $r = 0.937$ ,  $p = 0.0058$ ). (C) Heatmaps of speed-binned normalized calcium activity of all significantly positively speed-modulated dHPC $^-$  (top) and dHPC $\rightarrow$ NAc (bottom) neurons. (D) Proportions of speed-excited neurons are comparable between dHPC $^-$  and dHPC $\rightarrow$ NAc populations ( $\chi^2(1, 5372) = 2.565$ ,  $p = 0.109$ ). (E-H) Speed-inhibited dHPC neurons. (E and F) Representative example of one speed-inhibited neuron. (E) Sample traces of velocity, position and one neuron's denoised calcium activity. Note the increased calcium activity in times of low velocity, irrespective of position. (F) Linear regression on average calcium events per velocity bin shows a significant negative relationship (slope =  $-1.0437 \times 10^{-4}$ , intercept =  $2.814 \times 10^{-3}$ ,  $r = -0.933$ ,  $p = 0.0065$ ). (G) Heatmaps of speed-binned normalized calcium activity of all significantly negatively speed-modulated dHPC $^-$  (top) and dHPC $\rightarrow$ NAc (bottom) neurons. (H) Negatively tuned neurons are overrepresented in the NAc-projecting population ( $\chi^2(1, 5372) = 13.66$ ,  $p = 0.00022$ ). Speed-modulated neurons were classified as showing a significant linear regression at  $p < 0.05$  after Benjamini/Hochberg FDR correction. All data are presented as mean  $\pm$  SEM. ns: not significant, \*\*\* $p < 0.001$ .

211 overrepresentation on individual task success (35, 52). We  
 212 thus divided sessions into high- and low-success based on  
 213 lick performance (lick precision and reward dispensation,  
 214 see Methods) and found significantly more dHPC $\rightarrow$ NAc place  
 215 cells near the reward zone (reward and anticipation zones) in  
 216 high-success sessions compared to low-success sessions ( $p$   
 217 = 0.0036, Welch's  $t$ -test). In contrast, dHPC $^-$  neurons only  
 218 showed a trend towards significance ( $p = 0.051$ , Welch's  $t$ -  
 219 test; Figure 3E-F). In line with previous studies, both neu-  
 220 ron populations also showed a strong correlation between  
 221 the success rate (percentage of rewarded laps) and the pro-  
 222 portion of place fields near the reward zone across sessions ( $r$   
 223 = 0.62; Figure S4F).

224 If reward zone information is preferentially encoded in  
 225 dHPC $\rightarrow$ NAc populations and NAc neurons play an integral  
 226 part in reward-related behaviors, we would expect linear  
 227 decoders to identify reward or anticipation zones more accu-  
 228 rately based on dHPC $\rightarrow$ NAc activity compared to that of  
 229 dHPC $^-$ . To test this, we trained a linear classifier based on  
 230 a support vector machine (SVM) with calcium activity and  
 231 reward zone information on odd/even laps and tested decod-

ing accuracy on even/odd laps, using either dHPC $^-$  or sam-  
 232 ple size-matched dHPC $\rightarrow$ NAc populations (see Methods). We  
 233 found that, within individual sessions, decoding accuracy of  
 234 the reward anticipation zone was significantly enhanced for  
 235 dHPC $\rightarrow$ NAc populations ( $p = 0.0195$ , Wilcoxon's test; Fig-  
 236 ure 3G). These findings demonstrate significant modulation  
 237 of dHPC $\rightarrow$ NAc neurons by local cue boundaries and enhanced  
 238 reward zone coding.  
 239

**Enhanced coding of low velocities in dHPC $\rightarrow$ NAc neu-**  
 240 **rons.** As correct performance in the spatial reward learning  
 241 task goes hand in hand with a reduction in velocity and an  
 242 increase of licking near the reward zone (see Figure S1K-  
 243 N), we wondered if such non-spatial task-relevant behavioral  
 244 features were encoded by dHPC neurons and its projections to  
 245 NAc (9, 54, 55). We hypothesized that NAc may have  
 246 privileged access to information on low velocities as mice  
 247 generally slow down near the reward zone, presumably to al-  
 248 low for better discrimination and to engage in anticipatory  
 249 licking. In line with previous analyses of speed coding in  
 250 hippocampal and parahippocampal regions (8, 56), we av-  
 251 eraged each neuron's calcium activity per velocity bin from  
 252

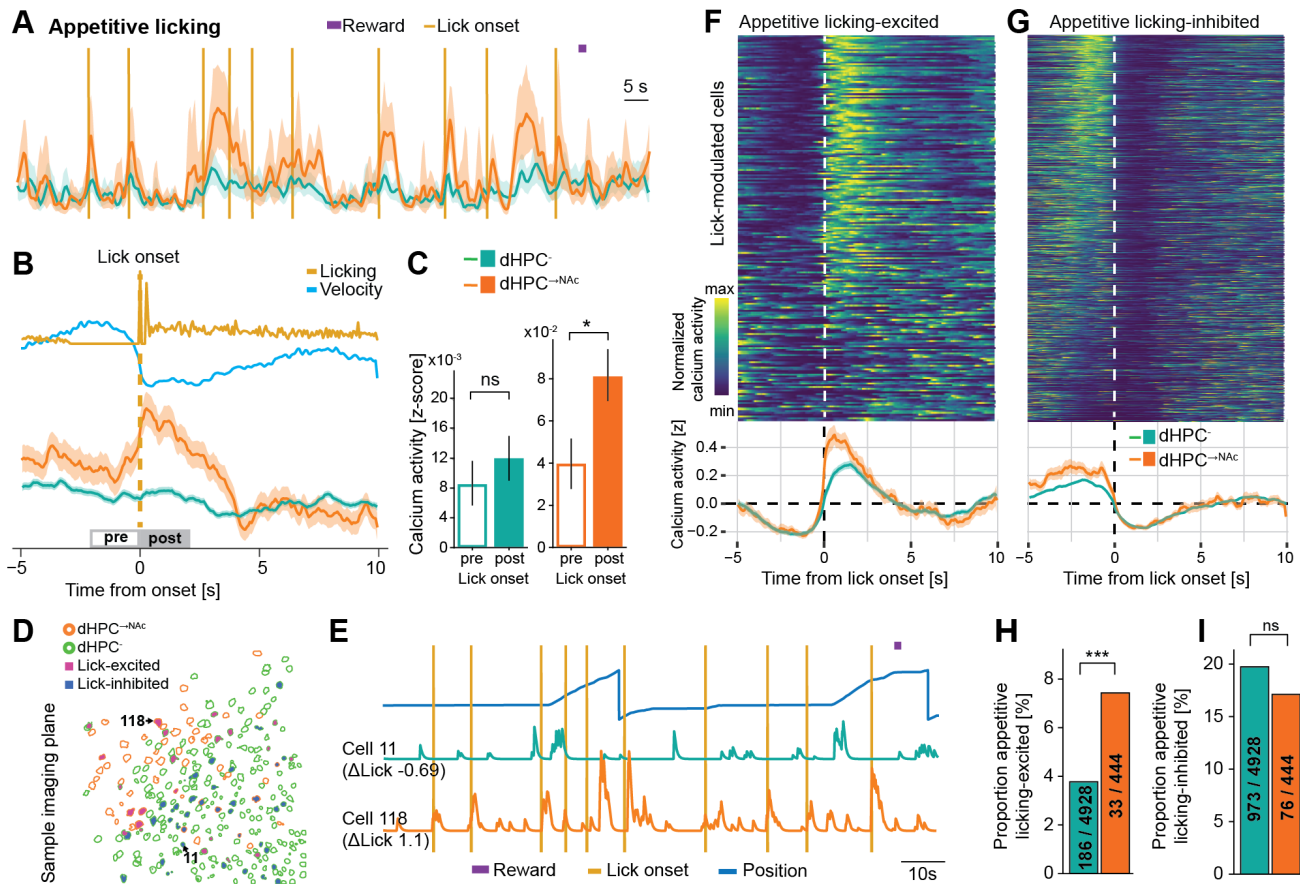

**Figure 5. dHPC<sup>→</sup>NAc neurons are excited by appetitive licking and are over-represented in lick-excited neurons.** (A-C) Appetitive licking is accompanied by increased neural activity in dHPC<sup>→</sup>NAc neurons but not dHPC<sup>-</sup> neurons. (A) Representative example showing reward dispensation (purple bar) and appetitive licking onsets (golden vertical lines) and population calcium activity from dHPC<sup>-</sup> (green) and dHPC<sup>→</sup>NAc (red) neurons. Note the robust increase of neural activity around lick onsets in the dHPC<sup>→</sup>NAc population. (B) Event-triggered average traces around appetitive licking onset, including licking and speed as well as population average calcium activity of dHPC<sup>-</sup> (green) and dHPC<sup>→</sup>NAc (red) neurons. Gray rectangles indicate time windows for comparing calcium activity shown in (C). (C) Calcium activity is differentially modulated by appetitive licking onset only in dHPC<sup>→</sup>NAc neurons; two-way mixed ANOVA;  $F_{licktiming}(1, 5370) = 2.843, p = 0.0918, F_{projection}(1, 5370) = 43.779, p < 0.001, F_{interaction}(1, 5370) = 7.073, p = 0.0079$ . Post-hoc  $t$ -tests with Bonferroni correction:  $t_{dHPC^-}(4927) = 0.871, p = 0.768; t_{dHPC \rightarrow NAc}(443) = 2.470, p = 0.0277$ . (D and E) Example imaging session and traces showing lick-excited and lick-inhibited neurons. (D) Field of view showing spatial profiles of dHPC<sup>-</sup> (green outlines) and dHPC<sup>→</sup>NAc (red outlines), some of which are classified as lick-excited (violet fill) or lick-inhibited (dark blue fill); neurons #11 and #118 are highlighted. (E) Behavioral traces and calcium activity of sample neurons #11 (lick-inhibited) and #118 (lick-excited). (F and G) Heatmaps (top) and event-triggered calcium activity averages (bottom) of neurons classified as appetitive licking-excited (F) and licking-inhibited (G). (H) Proportion of appetitive licking-excited neurons is higher in NAc-projecting neurons;  $\chi^2(1, 5372) = 13.018, p = 0.00031$ . (I) Proportion of appetitive licking-inhibited neurons is not different between populations;  $\chi^2(1, 5372) = 1.626, p = 0.202$ . All data are presented as mean  $\pm$  SEM. ns: not significant, \* $p < 0.05$ , \*\*\* $p < 0.001$ . See also Figure S5.

253 2 to 30 cm/s and regressed this activity against velocity.  
 254 Neurons with a significant regression model (after correct-  
 255 ing for false discovery rate) and positive slope were classif-  
 256 ed as speed-excited (Figure 4A-B). We found around 15 %  
 257 of neurons were positively speed-modulated, with compar-  
 258 able proportions between dHPC<sup>-</sup> and dHPC<sup>→</sup>NAc neurons (13  
 259 % vs. 16 %,  $p = 0.109, \chi^2$ ; Figure 4C-D). We also identified  
 260 neurons with a significant velocity regression but a negative  
 261 slope (Figure 4E-F). We found approximately 15 % of such  
 262 speed-inhibited neurons, with a significantly larger propor-  
 263 tion among the dHPC<sup>→</sup>NAc population (15 % vs. 21 %,  $p =$   
 264 0.00022,  $\chi^2$ ; Figure 4G-H). These results suggest widespread  
 265 modulation of dHPC neuronal activity by non-spatial features  
 266 such as velocity, with dHPC<sup>→</sup>NAc neurons specifically over-  
 267 representing low speeds.

268 **Overrepresentation of appetitive licking-excited**  
 269 **dHPC<sup>→</sup>NAc neurons.** Besides a decrease in velocity when

approaching the reward zone, mice also increasingly engaged  
 in licking behavior (see Figure 1B-D). Given the NAc's dual  
 role in appetitive and consummatory behaviors (57), we  
 wondered if licking behaviors might be reflected in the neural  
 activity of dHPC<sup>→</sup>NAc neurons. For this, we distinguished  
 between consummatory licking which occurs after a reward  
 is dispensed and allows the mouse to consume the reward  
 provided, and appetitive licking which is an operant behavior  
 that will lead to reward dispensation when performed at  
 the correct location on the belt. We found a significant  
 decrease of calcium activity during reward consumption in  
 both dHPC<sup>-</sup> and dHPC<sup>→</sup>NAc populations (Figure S5A-C).  
 Appetitive licking, on the other hand, had no apparent effect  
 on neural activity in dHPC<sup>-</sup> neurons but coincided with a  
 significant increase in calcium activity in the dHPC<sup>→</sup>NAc  
 population that began about one second before lick onset  
 and then fell below baseline 4 seconds after licking (Fig-  
 ure 5A-C). We investigated if this population-averaged data

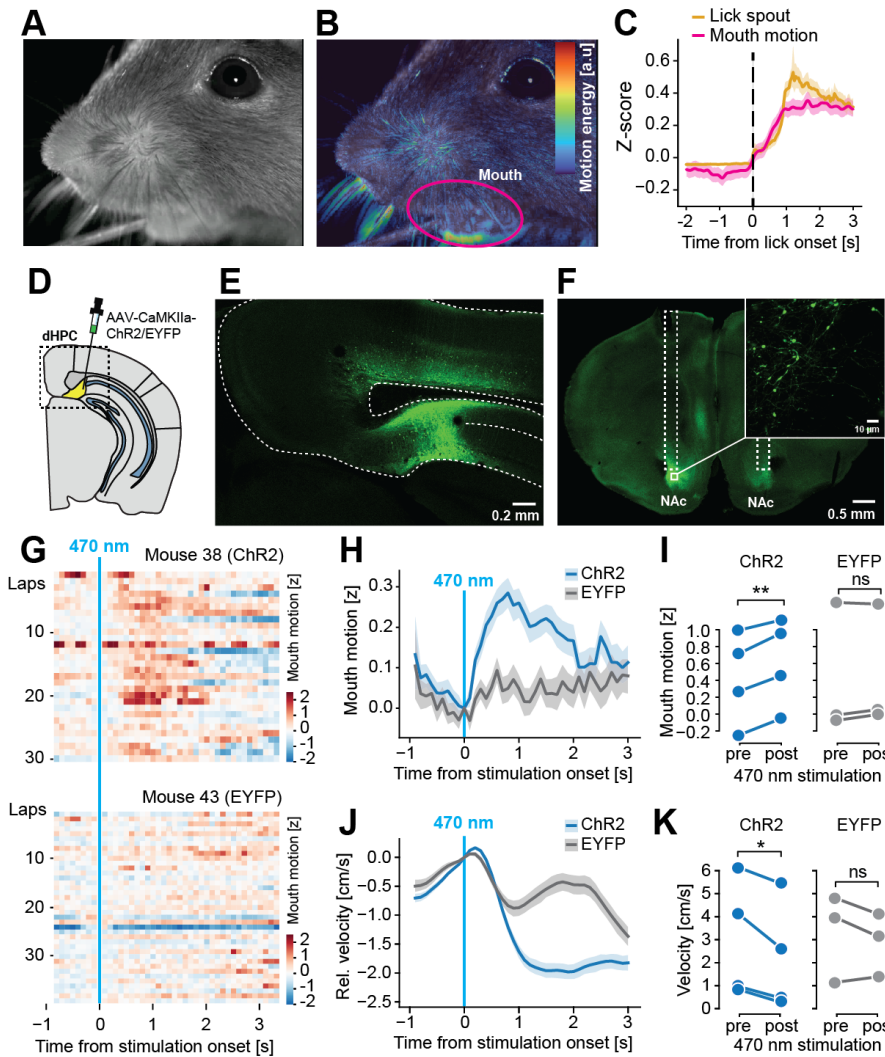

**Figure 6. Optogenetic stimulation of dHPC axons in NAc induces mouth movement and deceleration.** (A-C) Tracking of orofacial movements via infrared camera recordings. (A) Example still image from near-infrared camera, sampled at 75 Hz. (B) False-color coded motion energy (pixel-by-pixel intensity difference to previous image) overlaid over sample image from (A). Automatically segmented mouth region is indicated by a purple line. (C) Average motion energy in mouth region increases with licking. Golden line shows analog lick spout signal. (D-F) Experimental approach for optogenetic dHPC $\rightarrow$ NAc stimulation. (D) Injection schematic. (E) Somatic expression of ChR2-EYFP in dorsal pre-subiculum. (F) Axonal expression of ChR2-EYFP in the NAc, where light fibers are placed (tracts indicated by white dotted lines). (G) Representative examples of mouth motion around onset of optogenetic stimulation in an animal expressing ChR2 (top) or EYFP control (bottom). (H) Trial-averaged mouth motion activity around time of optogenetic stimulation in ChR2 (blue) and EYFP (gray)-expressing mice. (I) Mouth motion is significantly increased with optogenetic stimulation in ChR2 animals ( $t(3) = 7.485$ ;  $p = 0.00494$ ) but not EYFP animals ( $t(2) = 1.353$ ;  $p = 0.309$ ). Paired  $t$ -tests;  $n = 4$  mice (ChR2),  $n = 3$  mice (EYFP). (J) Trial-averaged relative velocity around time of optogenetic stimulation in ChR2 (blue) and EYFP (gray)-expressing mice. (K) Velocity is significantly decreased with optogenetic stimulation in ChR2 animals ( $t(3) = -3.551$ ;  $p = 0.0381$ ) but not EYFP animals ( $t(2) = -1.263$ ;  $p = 0.334$ ). Paired  $t$ -tests;  $n = 4$  mice (ChR2),  $n = 3$  mice (EYFP). All data are presented as mean  $\pm$  SEM. ns: not significant, \* $p < 0.05$ , \*\* $p < 0.01$ .

is reflected on the single-cell level and if there are individual cells that are reliably modulated by appetitive licking (Figure 5D-E and Figure S5D-E). Comparing the pre- and post-lick neural activity for each neuron for each appetitive lick event, we identified a total of 1,268 neurons (24 %) that were significantly (negatively or positively) modulated by appetitive licking (Figure 5F-I). Interestingly, while the proportion of lick-inhibited neurons was comparable between dHPC $\rightarrow$  and dHPC $\rightarrow$ NAc populations (19.7 % vs 17.1 %,  $p = 0.20$ ,  $\chi^2$ ; Figure 5I), we found a significantly larger proportion of lick-excited neurons in dHPC $\rightarrow$ NAc populations (3.8 % vs 7.4 %,  $p < 0.001$ ,  $\chi^2$ ; Figure 5H). These findings suggest that dHPC does not route reward information per se to NAc, but rather information on appetitive behaviors required to obtain such rewards.

**Optogenetic activation of dHPC terminals in NAc induces mouth movement and deceleration.** Given the NAc's hypothesized role as an interface between limbic and motor systems (25), we investigated if the observed increase of calcium activity in dHPC $\rightarrow$ NAc neurons may be a corollary signal of motor action or indeed serve a causal role in appetitive behaviors (58). To enable high-resolution behavioral

tracking, we monitored mouse orofacial movements using a high-speed near-infrared camera (Figure 6A-C). To test for a causal role of excitatory dHPC $\rightarrow$ NAc projections in appetitive behaviors, we injected animals with either CaMKIIa-driven ChR2 or EYFP into dHPC and implanted light fibers in the NAc ( $n = 4/3$  mice; Figure 6D-F). After habituating mice to run on the treadmill and receive rewards upon licking on the lick spout, mice were given 5 mW of 473 nm 20 Hz (5 ms duration) pulsed laser light for up to 10 seconds upon entry into a hidden light stimulation zone.

We found that, shortly after stimulation onset, ChR2-expressing mice reliably showed increased mouth movement for up to two seconds after stimulation, while we observed no effects in mice expressing EYFP ( $p_{\text{ChR2}} = 0.0099$ ,  $p_{\text{EYFP}} = 0.617$ , paired  $t$ -tests; Figure 6G-H). In line with this, we also found a significant deceleration of running on the treadmill upon light delivery in ChR2 animals but not EYFP animals ( $p_{\text{ChR2}} = 0.0381$ ,  $p_{\text{EYFP}} = 0.334$ , paired  $t$ -tests; Figure 6J-K). These findings support the idea that dHPC $\rightarrow$ NAc projections may not simply represent task-related non-spatial behavioral features but may in fact represent a driving force in the generation of task-relevant appetitive behavior.

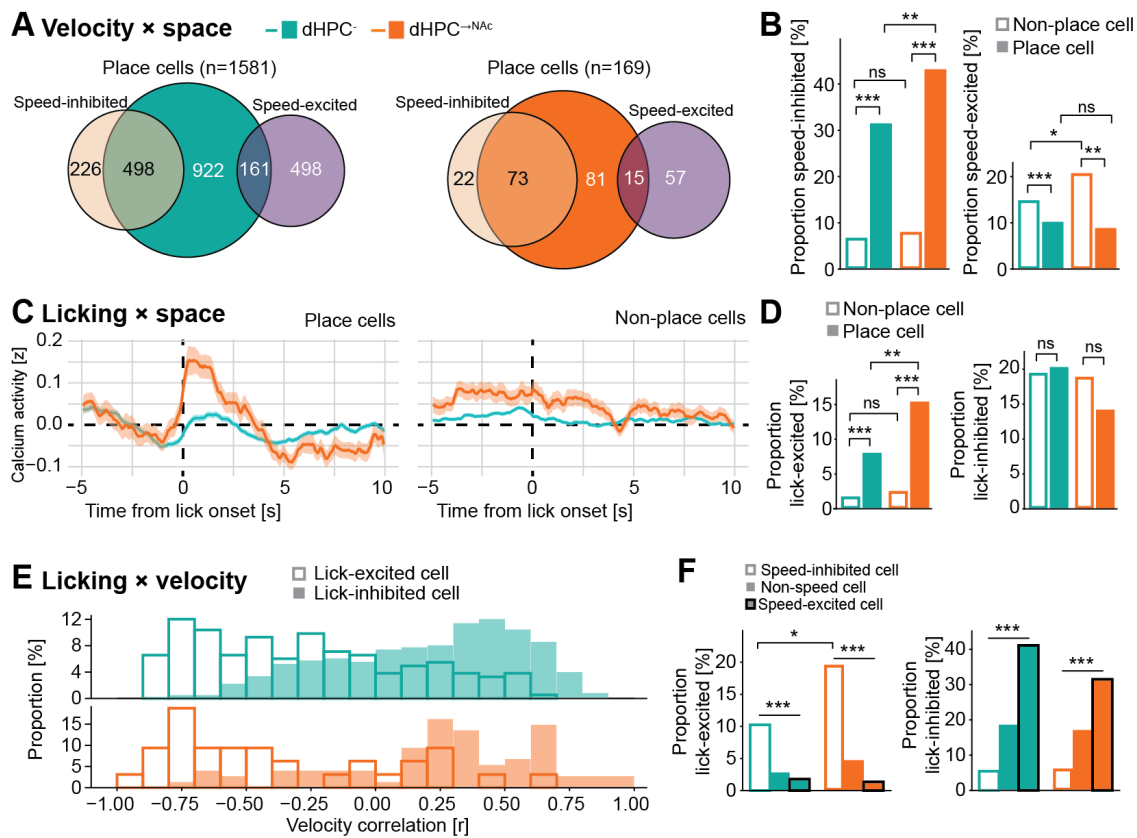

**Figure 7. Enhanced conjunctive coding of space, velocity and licking in NAc-projecting neurons.** (A and B) Conjunctive coding of space and velocity. (A) Venn diagrams of dHPC<sup>-</sup> (left) and dHPC<sup>→NAc</sup> (right) place cells and their overlaps with negatively (ocher) and positively (purple) tuned speed cells. Numbers shown refer to absolute numbers of neurons classified. (B) Proportions of dHPC<sup>-</sup> (green) and dHPC<sup>→NAc</sup> (red) place cells (fill) and non-place cells (no fill) that are also significantly speed-modulated. A larger proportion of place cells is speed-inhibited compared to non-place cells (dHPC<sup>-</sup>:  $\chi^2(1, 4928) = 522.71$ ; dHPC<sup>→NAc</sup>:  $\chi^2(1, 444) = 75.02$ ). dHPC<sup>→NAc</sup> place cells also have a higher proportion of speed-inhibited cells than dHPC<sup>-</sup> place cells ( $\chi^2(1, 1750) = 8.977$ ). Speed-excited neurons are overrepresented in non-place cells compared to place cells (dHPC<sup>-</sup>:  $\chi^2(1, 4928) = 20.034$ ; dHPC<sup>→NAc</sup>:  $\chi^2(1, 444) = 9.966$ ). dHPC<sup>→NAc</sup> non-place cells also have a higher proportion of speed-excited cells than dHPC<sup>-</sup> non-place cells ( $\chi^2(1, 3622) = 6.255$ ). (C and D) Conjunctive coding of space and licking. (C) Event-triggered average calcium traces for dHPC<sup>-</sup> (green) and dHPC<sup>→NAc</sup> (red) place cells (left) and non-place cells (right). (D) Proportions of lick-excited neurons are significantly enriched in dHPC<sup>-</sup> ( $\chi^2(1, 4928) = 114.515$ ) and dHPC<sup>→NAc</sup> ( $\chi^2(1, 444) = 23.248$ ) place cells compared to non-place cells. The proportion of dHPC<sup>→NAc</sup> lick-excited place cells is also higher than the proportion of dHPC<sup>-</sup> lick-excited place cells ( $\chi^2(1, 1750) = 9.442$ ); there is no difference between non-place cells ( $\chi^2(1, 3622) = 0.488$ ,  $p = 0.485$ ). There is no difference in the proportions of lick-inhibited place and non-place dHPC<sup>-</sup> and dHPC<sup>→NAc</sup> neurons ( $\chi^2$ s, all  $p > 0.05$ ). (E and F) Conjunctive coding of velocity and licking. (E) Histogram of lick-excited (no fill) and lick-inhibited (fill) cells' velocity correlations (green: dHPC<sup>-</sup>; red: dHPC<sup>→NAc</sup>). Note the negative velocity correlations of lick-excited cells and positive velocity correlations for lick-inhibited cells. (F) Proportions of lick-excited (left) and lick-inhibited (right) cells among speed-inhibited (no fill), non-speed-modulated (fill, black stroke) dHPC<sup>-</sup> (green) and dHPC<sup>→NAc</sup> (red) cells. Proportions of lick-excited cells are overrepresented in speed-inhibited cells (dHPC<sup>-</sup>:  $\chi^2(2, 4928) = 100.484$ ; dHPC<sup>→NAc</sup>:  $\chi^2(2, 444) = 27.608$ ). Lick-excited neurons are further enriched in speed-inhibited dHPC<sup>→NAc</sup> neurons compared to dHPC<sup>-</sup> neurons ( $\chi^2(1, 830) = 6.564$ ). Proportions of lick-inhibited cells are overrepresented in speed-excited cells (dHPC<sup>-</sup>:  $\chi^2(2, 4928) = 290.832$ ; dHPC<sup>→NAc</sup>:  $\chi^2(2, 444) = 18.825$ ). All data are presented as mean  $\pm$  SEM. ns: not significant, \* $p < 0.05$ , \*\* $p < 0.01$ , \*\*\* $p < 0.001$ .

332 **Enhanced conjunctive coding of space, velocity, and**  
 333 **appetitive behaviors in dHPC<sup>→NAc</sup> neurons.** We identi-  
 334 fied cells modulated by space, velocity, and appetitive lick-  
 335 ing. Previous studies suggested that individual hippocampal  
 336 neurons do not necessarily exclusively code for one single  
 337 feature but are instead able to conjunctively encode various  
 338 environmental properties (9, 55, 59, 60). Such conjunctive  
 339 coding may be particularly relevant for downstream linear  
 340 decoders to select task-appropriate actions (61, 62). We thus  
 341 investigated speed and lick modulation of projection-specific  
 342 place cells and interactions between velocity and lick modu-  
 343 lation.

344 We first analyzed speed coding in dHPC<sup>→NAc</sup> place cells  
 345 and compared it to the dHPC<sup>-</sup> population (Figure 7A-B). We  
 346 found about one third of hippocampal place cells were also  
 347 speed-inhibited, in contrast to only about 7 % of non-place  
 348 cells. This effect was particularly pronounced in dHPC<sup>→NAc</sup>

349 place cells (43 % vs. 31 %,  $p = 0.0027$ ,  $\chi^2$ ). Conversely,  
 350 place cells were significantly less likely to be speed-excited  
 351 than non-place cells (10 % vs. 15 %,  $p < 0.001$ ,  $\chi^2$ ), an ef-  
 352 fect that was again more pronounced in dHPC<sup>→NAc</sup> neurons.  
 353 This shows that dHPC place cells, and in particular those pro-  
 354 jecting to NAc, are more likely to be speed-inhibited, and less  
 355 likely to be speed-excited.

356 We next analyzed lick modulation of place cells and, sur-  
 357 prisingly, found that the previously observed lick-related in-  
 358 crease in calcium activity (Figure 5B) was largely carried by  
 359 place cells and not by non-place cells (Figure 7C). This ef-  
 360 fect seems to be mostly carried by lick-excited neurons that  
 361 are significantly overrepresented in place cells compared to  
 362 non-place cells (8 % vs. 2 %,  $p < 0.001$ ,  $\chi^2$ ), particularly  
 363 in dHPC<sup>→NAc</sup> neurons (15 % vs. 3 %,  $p < 0.001$ ,  $\chi^2$ ; Fig-  
 364 ure 7D). Lick-inhibited neurons, on the other hand, were  
 365 distributed equally between place and non-place dHPC<sup>-</sup> and



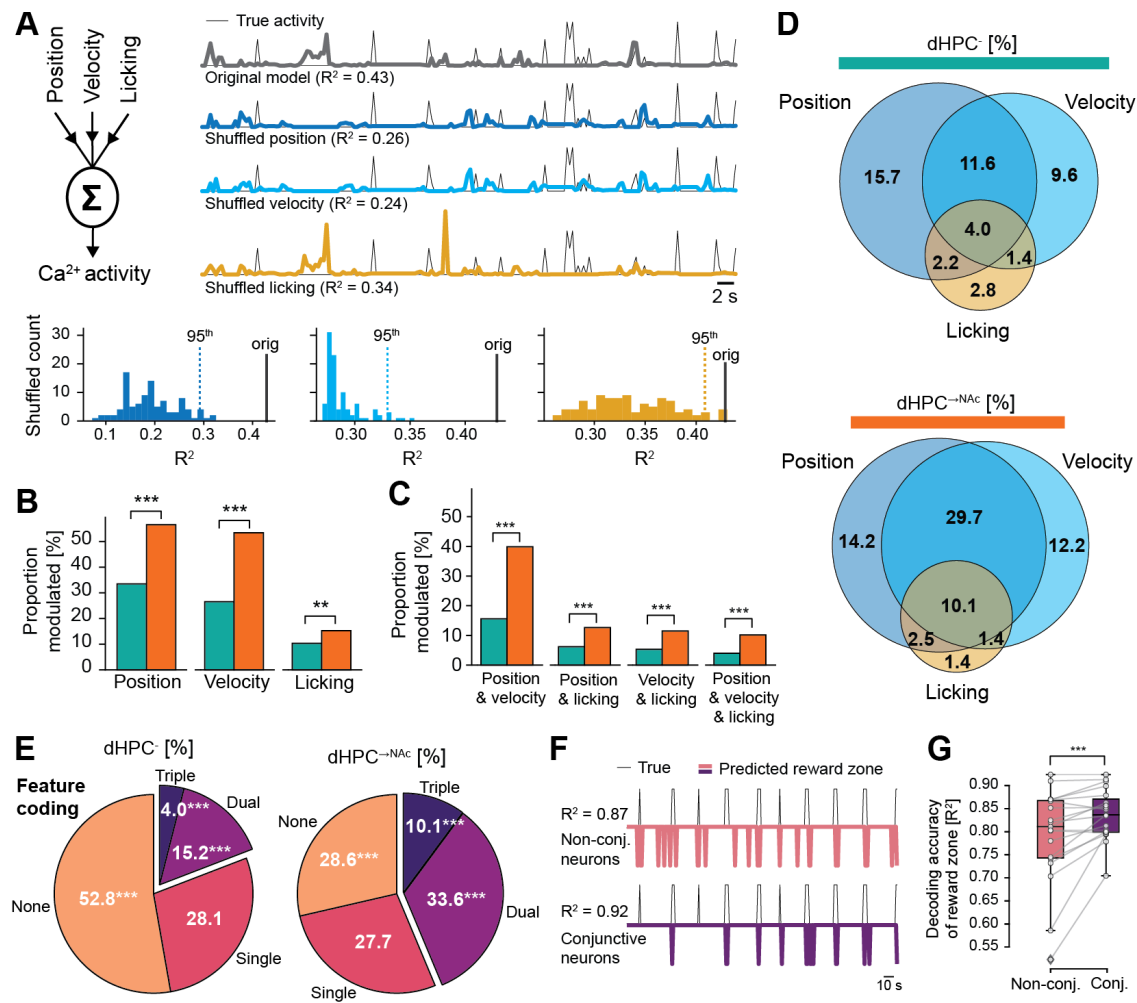

**Figure 8. A generalized linear model confirms enhanced conjunctive coding in NAc-projecting neurons.** (A) Schematic of the generalized linear model (GLM) using position, velocity, and appetitive licking data as predictors for each neuron's calcium activity (left). Example modelling approach for a triple conjunctive neuron (right). Upper traces show true calcium activity (downsampled and normalized) of test dataset (thin black line) as well as predictions of original model (thick gray) and one example each for each shuffled feature. Note the reductions in prediction quality when features are shuffled. Bottom histograms show  $R^2$  distributions for 100 shuffled models for each feature. Dotted line represents value of 95th percentile, thick black line represents original model's  $R^2$ . (B) Increased proportions of dHPC<sup>-</sup> neurons modulated by position ( $\chi^2(1, 5372) = 93.634$ ), velocity ( $\chi^2(1, 5372) = 141.86$ ), and licking ( $\chi^2(1, 5372) = 10.050$ ). (C) Increased proportions of conjunctive coding in dHPC<sup>-</sup> neurons for position & velocity ( $\chi^2(1, 5372) = 163.97$ ), position & licking ( $\chi^2(1, 5372) = 26.029$ ), velocity & licking ( $\chi^2(1, 5372) = 27.145$ ), and position & velocity & licking ( $\chi^2(1, 5372) = 34.993$ ). (D) Venn diagrams showing overlap of neurons GLM-classified as modulated by position, velocity and licking in dHPC<sup>-</sup> (top) and dHPC<sup>→NAc</sup> (bottom) neurons. (E) Proportions of  $n$ -feature coding neurons in dHPC<sup>-</sup> (left) and dHPC<sup>→NAc</sup> (right) populations. Non-coding neurons are overrepresented in dHPC<sup>-</sup> neurons ( $\chi^2(1, 5372) = 35.382$ ); single-coding neurons are comparably distributed ( $\chi^2(1, 5372) = 0.0057$ ); dual-coding ( $\chi^2(1, 5372) = 61.336$ ) and triple-coding ( $\chi^2(1, 5372) = 30.447$ ) neurons are overrepresented in dHPC<sup>→NAc</sup> neurons. (F and G) A linear classifier to decode presence of reward zone. (F) Example true presence of reward zone (thin line) and decoder predictions based on non-conjunctive neurons (pink; top) and conjunctive-coding neurons (dark purple; bottom). (G) Conjunctive-coding neurons allow a linear decoder to classify the presence of reward zone more accurately than non-conjunctive coding neurons (Wilcoxon's  $W(18) = 14.0$ ).  $**p < 0.01$ ,  $***p < 0.001$ . See also Figure S6.

dHPC<sup>→NAc</sup> neurons. These findings show that a large majority of lick-excited neurons, especially in the dHPC<sup>→NAc</sup> population, also code for spatial information. Finally, we investigated interactions between lick and velocity modulation. Comparing velocity correlations of lick-excited and lick-inhibited neurons, we observed a clear skew of lick-excited cells to have more negative velocity correlations and lick-inhibited cells to have more positive velocity correlations, visible in both dHPC<sup>-</sup> and dHPC<sup>→NAc</sup> populations (Figure 7E). This results in significantly more speed-inhibited cells to be lick-excited compared to speed-excited cells (11 % vs. 2 %,  $p < 0.001$ ,  $\chi^2$ ), an effect that was even more pronounced in dHPC<sup>→NAc</sup> neurons (20 % vs. 1 %,  $p < 0.001$ ,  $\chi^2$ ; Figure 7F). Conversely, speed-excited neurons were much more likely to be lick-inhibited than speed-inhibited neurons (40

% vs. 6 %,  $p < 0.001$ ,  $\chi^2$ ). These results demonstrate that there is a strong inverse relationship between lick and velocity modulation.

One caveat of such conjunctive coding analyses is that in our behavioral task, trained mice often show highly stereotypical behavior, such that mice would mostly lick at one location where they would also slow down (see Figure 1C and Figure S1K-N). In light of this, conjunctive coding could be an epiphenomenon of collinear behavioral features. To account for this collinearity, we modelled the influence of three key behavioral features (space, velocity, and appetitive licking) on the activity of each neuron by building a generalized linear model for each neuron (GLM; Figure 8A). On average, we found that our models could explain close to 40% of the variance observed in our test datasets (Figure S6A),

396 with dHPC $\rightarrow$ NAc neurons showing increased feature impor- 452  
397 tance for position and licking (Figure S6B). To determine 453  
398 significant contributions of the three behavioral features, we 454  
399 next built  $3 \times 100$  models in which one of the behavioral fea- 455  
400 tures was randomly shuffled against time, and compared the 456  
401 variance explained to the original model (Figure 8A; see also 457  
402 ref (63)). Thus, if neural activity spuriously coincided with 458  
403 the activity of one behavioral feature that could be simi- 459  
404 larly explained by a largely collinear behavioral feature, the 460  
405 model's predictive performance should be mostly unaffected 461  
406 by this shuffling. The average drop in variance explained 462  
407 to the full model was significantly stronger in dHPC $\rightarrow$ NAc 463  
408 neurons compared to dHPC $^-$  for position and velocity but 464  
409 not licking (Figure S6C). We classified significant modula-  
410 tion as behavioral features whose shuffling led to a reduction  
411 in variance explained in more than 95% of shuffled models.  
412 We found that cells thus encoding space, velocity, and lick-  
413 ing were overrepresented in dHPC $\rightarrow$ NAc compared to dHPC $^-$   
414 neurons (space:  $p < 0.001$ ; velocity:  $p < 0.001$ ; licking:  $p$   
415 = 0.0015;  $\chi^2$ ; Figure 8B). Importantly, we also found sig-  
416 nificantly increased proportions of conjunctive coding for all  
417 three feature combinations as well as triple-conjunctive neu-  
418 rons in dHPC $\rightarrow$ NAc neurons compared to dHPC $^-$  (all com-  
419 binations  $p < 0.001$ ,  $\chi^2$ ; Figure 8C-D). This results in a sig-  
420 nificantly higher proportion of conjunctive coding neurons in  
421 dHPC $\rightarrow$ NAc neurons compared to dHPC $^-$  (44 % vs. 19 %,  $p$   
422 < 0.001,  $\chi^2$ ; Figure 8E).

423 As conjunctive coding has been suggested to aid downstream  
424 linear decoders to select task-appropriate actions (55, 61),  
425 we wondered if this increased conjunctive code might al-  
426 low linear decoders to identify the presence of the reward  
427 zone more correctly in our task. We thus trained an SVM-  
428 based linear classifier on each trial's odd/even laps' reward  
429 zones and tested the decoding accuracy on even/odd laps,  
430 based on conjunctive or randomly sample size-matched non-  
431 conjunctive coding neurons (Figure 8F). We found enhanced  
432 reward zone decoding accuracy for conjunctive compared to  
433 non-conjunctive coding neurons ( $p < 0.001$ , Wilcoxon's test;  
434 Figure 8G). Thus, our data suggest that the enhanced con-  
435 junctive coding observed in dHPC $\rightarrow$ NAc neurons allows NAc  
436 neurons to better identify the reward zone and guide task-  
437 appropriate appetitive behavior.

## 438 Discussion

439 While our understanding of the principal mechanisms by  
440 which internal and environmental features are processed by  
441 hippocampal circuits has greatly advanced (5, 6), the infor-  
442 mation content of its various output streams and their spe-  
443 cific contributions to behavior remain largely unresolved.  
444 The NAc, with its proposed role as an integrator between  
445 limbic and motor systems (25) seems an ideal candidate to  
446 transform hippocampal mnemonic and contextual informa-  
447 tion into task-relevant behaviors (26), but evidence for such a  
448 role has remained sparse.

449 One main finding was the identification of a larger proportion  
450 of place cells among the dHPC $\rightarrow$ NAc population that also en-  
451 coded more spatial information and showed both enhanced

trial-to-trial reliability and in-place-field activity. Our data  
confirm previous suggestions that the NAc receives spatial in-  
formation from dHPC (26) and likely explains previously de-  
scribed spatial tuning of NAc neurons (29). The dHPC $\rightarrow$ NAc  
population's observed enhanced spatial tuning and stronger  
modulation of local cues parallels previously described dif-  
ferences between deep and superficial dHPC neurons (18).  
Indeed, vHPC $\rightarrow$ NAc projection neurons have been shown  
to accumulate mostly in deep layers (64), raising the possi-  
bility that previously observed anatomical-functional differ-  
ences could at least partly be explained by differences in pro-  
jection targets, thus adding another important layer of com-  
plexity to pyramidal cell heterogeneity (17).

Place cells in CA1 and subiculum have long been appreci-  
ated to overrepresent reward/goal zones (53, 65, 66) in a way  
that correlates with behavioral performance (35, 52). This  
effect likely depends on the interaction of inputs from en-  
torhinal cortex layer 3, dopaminergic inputs from VTA, and  
hippocampal NMDA receptors (36, 52, 67). While previ-  
ous studies suggested a role for a largely undefined dedi-  
cated population of dHPC cells in this overrepresentation (65)  
and differences have been observed along the radial dCA1 axis  
(35), evidence for projection-specific reward zone represen-  
tations has remained sparse. Although synchronous activity  
has been observed between dHPC and NAc during spatial re-  
ward learning tasks (38, 68, 69), in line with a central role of  
NAc in reward learning (reviewed in ref (70)), our findings  
present direct evidence of increased reward zone overrepre-  
sentation by dHPC $\rightarrow$ NAc neurons. Interestingly, a previous  
study (19) showed projection-specific ambiguity of reward  
zone activity depending on vCA1 $\rightarrow$ NAc collaterals. Future  
studies should investigate potential functional differences in  
collaterals of dHPC projections (41).

Successful behavioral performance in our spatial reward  
learning task depended on a decrease in velocity and in-  
creased appetitive lick activity as mice approached the hidden  
reward zone. In line with previous work (8, 9, 12, 20), we  
found a considerable proportion of speed-modulated dHPC  
neurons. Interestingly, NAc-projecting neurons were more  
likely to be speed-inhibited, suggesting an elevated role in  
reward approach behaviors (see also ref (12)). Similarly,  
we observed significant modulation of hippocampal neurons  
during appetitive and consummatory licking (see also refs  
(12, 54)). This modulation was dichotomous: consumma-  
tory licking resulted in widespread suppression of dHPC ac-  
tivity, while appetitive licking led to enhanced activity in  
dHPC $\rightarrow$ NAc neurons. Activity of dHPC neurons, and espe-  
cially those projecting to NAc, thus seems to mirror the activ-  
ity within NAc: Inhibition of NAc DIR medium spiny neu-  
rons (MSNs) has been observed during lick behavior (71–73)  
and was shown to be both necessary (71, 74) and sufficient  
(71, 75) for consummatory licking. We found that the origin  
of these signals may be localized upstream, similar to recent  
findings of an inhibitory permissive drive for licking in vHPC  
projections to the NAc (72, 76) and that inhibiting these pro-  
jections facilitates licking (72). This suggests a similar in-  
volvement of dHPC $^-$  and vHPC $\rightarrow$ accumbens projections for

509 consummatory licking.  
510 Contrasting this consumption-related inhibition, we found  
511 appetitive lick-related dHPC $\rightarrow$ NAc excitation and optogenetic  
512 induction of lick-related behaviors. This dichotomy likely re-  
513 flects previously described differences in the NAc's role for  
514 consummatory and appetitive behaviors (57): vHPC $\rightarrow$ NAc  
515 activity was shown to increase during active food investiga-  
516 tion (76) and around the time of lever pressing to obtain a  
517 reward (Iyer E, Muir J, Namuhoranye B, Bagot, R. Gluta-  
518 matergic afferents to the nucleus accumbens integrate out-  
519 comes in reward-learning. Poster S01-181, FENS Forum  
520 2022), while optogenetic stimulation of this projection facili-  
521 tated nose poke and lever pressing behaviors (33, 77). Given  
522 that optogenetic stimulation of D2R MSNs in the NAc shell  
523 was also found to produce repetitive jaw movements (78), it  
524 is likely that D1R and D2R MSNs, both of which are tar-  
525 geted by HPC axons (34, 79, 80), might play dichotomous  
526 roles in appetitive and consummatory behaviors (see also refs  
527 (34, 81)). Future studies should aim to resolve the behavioral  
528 roles of specific NAc cell types targeted by HPC neurons.

529 In our analysis of dHPC $\rightarrow$ NAc coding properties, we un-  
530 covered more neurons individually coding for two or three  
531 aspects of space, velocity, and lick activity specifically in  
532 identified projection neurons. Such conjunctive coding, or  
533 mixed selectivity, has been previously found in hippocam-  
534 pal neurons to combine coding of space with direction, ve-  
535 locity, appetitive behaviors, behavioral tasks, future paths  
536 (“splitter cells”), context, or objects (9, 12, 13, 55, 66, 82).  
537 These conjunctions are hypothesized to combine “where”  
538 and “what” information to disambiguate different experi-  
539 ences occurring in the same location, thus building a “scaf-  
540 fold” for episodic memories that allows unambiguous later  
541 retrieval (14, 83, 84). Relatedly, theoretical and experimen-  
542 tal studies demonstrated that such high-dimensional coding  
543 facilitates action selection by putative downstream linear de-  
544 coders tasked with action selection and generating behavior  
545 (61, 62, 85), and was found to scale with task demands and  
546 performance (55, 62, 85–87). Indeed, our data show that con-  
547 junctive coding improved reward zone detection by a linear  
548 decoder, similar to a recent study in retrosplenial cortex that  
549 demonstrated enhanced decoding near a reward zone by con-  
550 junctive coding neurons (87). In line with previous findings  
551 of increased conjunctive coding in prefrontal cortex $\rightarrow$ NAc  
552 projection neurons (88) and elevated proportions of splitter  
553 cells in dSub $\rightarrow$ NAc neurons (20), we thus propose that dHPC  
554 routes strongly conjunctive task-relevant information to facil-  
555 itate NAc action selection.

556 The NAc has been described as a key node transforming moti-  
557 vational information from the limbic system into motor be-  
558 haviors (25), but the information flow of specific projection  
559 neurons has remained elusive. Our data demonstrate that  
560 dHPC routes enhanced spatial information to the NAc that  
561 is conjunctively enriched by further spatial and non-spatial  
562 task-relevant features. We show that this conjunctive code  
563 improves linear decoding to guide downstream action selec-  
564 tion, and that dHPC can drive the execution of appetitive mo-  
565 tor behaviors via the basal ganglia, as early studies suggested

(89). Thus, our findings identify a direct role for the hip-  
566 pocampus in the generation of motor behaviors and build an  
567 important bridge in our understanding of how sensory and  
568 mnemonic processes guide behavioral action.  
569

## 570 Materials and Methods

**571 Animals.** Experiments were performed in adult male and fe-  
572 male mice. C57Bl/6 ( $n = 16$ ) and Thy1-GCaMP6s ( $n = 6$ )  
573 mice (GP4.3; The Jackson Laboratory, Bar Harbor, USA)  
574 were bred under specific pathogen-free conditions. Heterozy-  
575 gous mice were group-housed with 12 hours reversed dark  
576 light cycle at 21°C and ad libitum food/water access until  
577 mice had recovered from surgery. Experiments were per-  
578 formed during the dark phase. All experiments were per-  
579 formed according to the Directive of the European Communi-  
580 ties Parliament and Council on the protection of animals used  
581 for scientific purposes (2010/63/EU) and were approved by  
582 the animal care committee of North Rhine-Westphalia, Ger-  
583 many.

**584 Viral vectors.** To co-express the static red fluorophore  
585 mCherry in Thy1-GCaMP6s animals, we injected retrograde  
586 (rg) serotype (90) adeno-associated virus (AAV) under con-  
587 trol of the polyglycokinase (pgk) promoter (AAVrg-pgk-Cre,  
588 Catalog #24593-AAVrg, titer:  $1 \times 10^{13}$  viral genomes (vg)  
589  $\text{ml}^{-1}$ , Addgene, Watertown, USA) in the NAc to enter axons  
590 and induce Cre expression in NAc-projecting neurons. Then,  
591 we used double-floxed inverse open reading frame (DIO)  
592 Cre-dependent mCherry under the human synapsin pro-  
593 moter in dHPC (AAV5-hSyn-DIO-mCherry, titer:  $1.1 \times 10^{13}$   
594  $\text{vg/ml}$ , Catalog #50459-AAV5, Addgene, Watertown, USA).  
595 For optogenetic experiments, we used unfloxed ChR2 (91)  
596 or control EYFP in excitatory neurons under the CaMKII  
597 promoter in the dHPC of C57Bl/6 mice (AAV2-CaMKII-  
598 hChR2(H134R)-EYFP-WPRE, titer:  $4 \times 10^{12}$  transducing  
599 units (TU), UNC #AV4381E, Vector Core at the University of  
600 North Carolina, Chapel Hill, USA; rAAV2-CaMKII-EYFP,  
601 titer:  $4.3 \times 10^{12}$  TU, UNC #AV6650, Vector Core at the Uni-  
602 versity of North Carolina, Chapel Hill, USA).

**603 Stereotactic virus injections.** For stereotactic injection of  
604 AAVs, mice were anesthetized with an intraperitoneal (i.p.)  
605 injection of a mixture of ketamine (0.13 mg/g) and xylazine  
606 (0.01 mg/g). Mice were head-fixed using a head holder  
607 (MA-6N, Narishige, Tokyo, Japan), placed into a motorized  
608 stereotactic frame (LuigsNeumann, Ratingen, Germany) and  
609 warmed by a self-regulating heat pad (Fine Science Tools,  
610 Heidelberg, Germany). After skin incision (5 mm) and re-  
611 moval of the periosteum, placement of the injection was de-  
612 termined in relation to bregma. A 0.5 mm wide hole was  
613 drilled through the skull (Ideal micro drill, World Preci-  
614 sion Instruments, Berlin, Germany). Stereotactic coordinates  
615 were taken from Franklin and Paxinos, 2008 (The Mouse  
616 Brain in Stereotaxic Coordinates, Third Edition, Academic  
617 Press). To induce retrograde labelling of NAc-projecting  
618 neurons in dHPC,  $2 \times 500$  nl of AAVrg-pgk-Cre were in-  
619 jected into the ipsilateral (right) nucleus accumbens (-1.3 mm

620 anterior-posterior, -1.0 mm lateral, 5.0 and 4.3 mm ventral,  
621 relative to Bregma) at 100 nl/min, using a UltraMicroPump,  
622 34G cannula and Hamilton syringe (World Precision Instru-  
623 ments, Berlin, Germany). To label projection neurons in red,  
624 200 nl of AAV5-hSyn-DIO-mCherry were injected into the  
625 ipsilateral dorsal hippocampus (3.38 mm anterior-posterior,  
626 -2.5 mm lateral, 1.8 mm ventral, relative to Bregma, at a 10°  
627 angle). For optogenetic experiments, 200 nl of either AAV2-  
628 CaMKII-hChR2(H134R)-EYFP-WPRE or rAAV2-CaMKII-  
629 EYFP were injected each bilaterally into dorsal hippocam-  
630 pus (3.38 mm anterior-posterior, ± 2.5 mm lateral, 1.8 mm  
631 ventral, relative to Bregma, at a 10° angle). After surgery,  
632 buprenorphine (0.05 mg/kg) was administered thrice daily for  
633 3 consecutive days. Implant surgery followed two weeks af-  
634 ter AAV injection.

635 **Cranial window surgery.** For awake hippocampal Ca2+  
636 imaging, a window was surgically implanted over the right  
637 dorsal hippocampus, one week after virus injections. The  
638 hippocampal window was assembled from a 1.7 mm long  
639 stainless-steel cannula (3 mm outer diameter) and a round  
640 cover slip (3 mm diameter). The coverslip was glued to  
641 the end of the cannula using UV curable adhesive (NOA81,  
642 Thorlabs, Dachau/Munich, Germany). Mice were anes-  
643 thetized and prepared for surgery as described above. The  
644 skin over the parietal skull and the periosteum were removed  
645 and wound edges sealed with Vetbond tissue adhesive (3M  
646 Animal Care Products, St Paul, USA). Skull surface was  
647 roughened by briefly applying gel etchant phosphoric acid  
648 (37.5 %; Kerr Dental, Scafati, Italy), carefully washing the  
649 skull surface and applying two-component dental adhesive  
650 (OptiBond FL, Kerr Dental, Scafati, Italy). A circular piece  
651 of the skull (3 mm in diameter) centered over the injection  
652 was carefully cut out using a sharp drill (Ideal micro drill,  
653 World Precision Instruments, Berlin, Germany). The dura  
654 was removed with forceps and mild vacuum suction was used  
655 to slowly remove the cortex within the craniotomy. Blood  
656 and aspirated tissue were washed out using a constant flow of  
657 artificial cerebrospinal fluid (ACSF). Intracranial aspiration  
658 was continued until the external capsule was exposed. The  
659 external capsule remained intact. The hippocampal window  
660 was manually inserted. During continuous perfusion with  
661 ACSF, the hippocampal window was lowered until sealing  
662 onto the external capsule. The hippocampal window was fix-  
663 ated, and the craniotomy sealed using UV curable dental ce-  
664 ment (Gradia Direct Flo, GC Corporation, Tokyo, Japan). An  
665 angular metal bar (Luigs & Neumann, Ratingen, Germany)  
666 for head fixation was placed paramedian on the skull. After  
667 surgery, buprenorphine (0.05 mg/kg) was administered thrice  
668 daily for 3 days.

669 **Behavioral task.** 3-4 days after recovery from surgery, mice  
670 were provided with spinning wheels in their cages and were  
671 placed under a reverse light/dark cycle. One week after  
672 surgery, food restriction and two-week habituation schedules  
673 were initiated. Mice were food-restricted by providing about  
674 80 % of their measured daily food pellets every 24 h. In  
675 the course of this, mice lost about 10-20 % of their origi-

676 nal weight before the start of training. Habituation consisted  
677 of progressive exposure of mice to manual handling by the  
678 experimenter, obtaining milk rewards through a metal can-  
679 nula, gentle manual head fixation, the treadmill apparatus,  
680 and, finally, head-fixed running on an unmarked treadmill  
681 belt with random rewards provided through a metal cannula  
682 lick spout after licking on it. The self-propelled treadmill  
683 (Luigs & Neumann) consisted of three rotating cylinders cov-  
684 ered by a 7 cm wide and 360 cm long textile belt (Luigs &  
685 Neumann) including six differently textured zones: horizon-  
686 tal and vertical glue stripes, glue dots, Velcro dots, vertical  
687 tape stripes and upright nylon spikes. The reward zone for  
688 imaging experiments was 30 cm long and was placed be-  
689 tween the end of the horizontal glue stripes and the begin-  
690 ning of the vertical tape stripes. The position of the mouse  
691 was recorded via an optical sensor (Luigs & Neumann) mea-  
692 suring the rotation of the treadmill cylinder underneath the  
693 mouse. Lick signals were measured by an analog piezo sen-  
694 sor; one full belt rotation was measured by an optical infrared  
695 sensor. All signals were collected at 10 kHz by an I/O board  
696 (USB-6212 BNC, National Instruments, Austin, USA) and  
697 recorded using custom-written Python software. After two  
698 weeks of habituation, mice were placed daily for 15 minutes  
699 on a cued (see above) treadmill belt on which they needed to  
700 lick on the metal spout in this hidden reward zone to obtain  
701 a liquid reward in the form of condensed milk. Milk was  
702 released by a miniature peristaltic pump (RP-Q1-S-P45A-  
703 DC3V, Takasago Fluidic Systems, Nagoya, Japan) that was  
704 triggered by custom-written Python software via an I/O board  
705 (USB-6212 BNC, National Instruments, Austin, USA). Af-  
706 ter five days of training, calcium activity was recorded while  
707 mice performed the learned task.

708 **Infrared camera behavioral tracking.** Headfixed mouse  
709 behavior was continuously monitored by simultaneously us-  
710 ing two monochrome CCD cameras (Basler acA 780-75gm)  
711 positioned at approximately 15 cm from the mouse. To cap-  
712 ture face dynamics, we used a high-resolution zoom lens (50  
713 mm FL, Thorlabs MVL50TM23); for body dynamics, we  
714 used a wide-angle lens (12 mm FL, Edmund Optics #33-  
715 303). Infrared illumination was provided via two 850 nm  
716 LED arrays (Thorlabs LIU850A), and cameras were outfitted  
717 with 850/40 nm bandpass filters (Thorlabs FB850-40). Both  
718 cameras' positions were aligned for each mouse before the  
719 start of recordings. Camera images were acquired at 25 or  
720 75 Hz with 782×582 pixels using pylon Camera Software  
721 Suite (Basler), each frame triggered by TTL pulses from the  
722 recording software. Files were saved in compressed MP4 for-  
723 mat before further processing.

724 **Two-photon calcium imaging.** Two-photon imaging was  
725 performed using an upright LaVision BioTec (Bielefeld, Ger-  
726 many) TrimScope II resonant scanning microscope, equipped  
727 with a Ti:sapphire excitation laser (Chameleon Ultra II,  
728 Coherent, Santa Clara, USA) operated at 920 nm for  
729 GCaMP6s fluorescence excitation, a second 1045 nm fixed-  
730 wavelength laser (Spectra Physics HighQ-2-IR, Newport  
731 Corp., Irvine, USA) for mCherry fluorescence excitation,

732 and a 16x objective (N16XLWD-PF, Nikon, Düsseldorf, Ger-  
733 many). GCaMP6s fluorescence emission was isolated using  
734 a band-pass filter (525/40, Semrock, Rochester, USA)  
735 and detected using a GaAsP PMT (H7422-40, Hamamatsu,  
736 Herrsching am Ammersee, Germany). mCherry fluorescence  
737 emission was isolated using a band-pass filter (590/40, Sem-  
738 rock, Rochester, USA) and detected using a GaAsP PMT  
739 (H7422-40, Hamamatsu, Herrsching am Ammersee, Ger-  
740 many). Both lasers were aligned such that they excited the  
741 same focal plane. Inspector software (LaVision BioTec) was  
742 used for microscope control and image acquisition. Image se-  
743 ries (2 channels, 1024×1024 pixels or 512×512 pixels, 350–  
744 850 μm square field of view) were acquired at 15.2 Hz or 30.5  
745 Hz, respectively. Frame capture signals were recorded by an  
746 I/O board (USB-6212 BNC, National Instruments, Austin,  
747 USA) that allowed subsequent data synchronization.

748 **Optogenetic stimulation.** For optogenetic experiments, di-  
749 rectly following virus injections, the skin over the parietal  
750 skull and the periosteum were removed and wound edges  
751 sealed with Vetbond tissue adhesive (3M Animal Care Prod-  
752 ucts, St Paul, USA). Skull surface was roughened by briefly  
753 applying gel etchant phosphoric acid (37.5 %; Kerr Dental,  
754 Scafati, Italy), carefully washing the skull surface and ap-  
755 plying two-component dental adhesive (OptiBond FL, Kerr  
756 Dental, Scafati, Italy). Two small 0.5 mm wide holes  
757 were drilled through the skull (Ideal micro drill, World Pre-  
758 cision Instruments, Berlin, Germany) and a two-ferrules  
759 fiber-optic cannula (TFC\_200/230-0.37\_5.5mm\_TS2.0\_FLT,  
760 Doric Lenses, Quebec, Canada) was implanted bilaterally on  
761 top of NAc (coordinates: +1.3 mm anterior-posterior, +/- 1  
762 mm lateral, -4.9 mm ventral from brain surface, relative to  
763 bregma). The craniotomy was then sealed using UV curable  
764 dental cement (Gradia Direct Flo, GC Corporation, Tokyo,  
765 Japan). An angular metal bar (Luigs & Neumann, Ratin-  
766 gen, Germany) for head fixation was placed paramedian on  
767 the skull. After surgery, buprenorphine (0.05 mg/kg) was  
768 administered thrice daily for 3 days. After one week of  
769 recovery, the food restriction and a two-week habituation  
770 schedules were started. After successful habituation, head-  
771 fixed mice received light stimulation via a fiber-coupled 473  
772 nm diode laser (LuxX 473-80, Omicron-Laserage) through  
773 a branching fiberoptic patchcord (BFP(2)\_200/220/900-  
774 0.37\_2m\_FCM\*-2xZF1.25; Doric Lenses, Quebec, Canada),  
775 at 5 mW light intensity, measured at the fiber output. Custom-  
776 written Python scripts were used to send a trigger signal to  
777 an analog isolated pulse generator (Model 2100, A-M Sys-  
778 tems, Sequim, USA) once animals entered a hidden optoge-  
779 netic stimulation zone. The pulse generator produced 5 ms  
780 long pulses at 20 Hz for a maximum duration of 10 seconds  
781 or until the mouse passed beyond the stimulation zone.

782 **Behavioral analysis.** Analog signals for position, licking,  
783 reward pump, full rotation of belt, and digital signals from  
784 infrared camera triggers, two-photon scanning triggers, and  
785 optogenetic stimulation triggers were collected at 10 kHz and  
786 saved as TDMS files. Data processing and analysis were per-  
787 formed in Python. Position signals in cm were reconstructed

using the optical sensor detecting a full rotation of the tread-  
mill belt. Velocity was calculated using a Kalman filter ap-  
plied to the position signal. Behavioral data were then down-  
sampled to either match the sampling rate of camera track-  
ing (25/75 Hz) for training data or to match the sampling  
rate of two-photon imaging (15/30 Hz), by using each time  
window's arithmetic mean (velocity), median (position, lap  
number, camera/scanner trigger), maximum (reward pump,  
optogenetic trigger), or standard deviation (licking). Discrete  
lick events were detected using Scipy's *find\_peaks* function  
with a minimum temporal distance of 0.33 s and a dynamic  
minimum height threshold that was individually determined  
by inspecting the synchronized infrared camera video. Lick  
bouts were classified as lick events that were <2 seconds apart  
from one another. Appetitive lick onsets were defined as lick  
bout onsets that were preceded by at least 3 seconds absence  
of lick events. Consummatory licking onset was defined as  
the first lick event between 0.5 seconds up to 5 seconds after  
reward pump trigger. Rewarded laps were defined as laps in  
which the reward pump was triggered by the animal's lick-  
ing. Relative licking refers to the cumulative analog lick sig-  
nal per position bin or reward zone. Successful laps were  
defined as laps in which mice showed at least 50 % of rela-  
tive licking in reward and anticipation zones and received a  
reward. High success trials were defined as trials consisting  
of at least 50 % of successful laps.

814 **Calcium signal processing.** Two-photon imaging data was  
815 processed using custom-written software in Python, largely  
816 based on CaImAn (v1.6.2; (44)). Green and red chan-  
817 nel 16-bit TIFF stack files (512×512 or 1024×1024 pix-  
818 els times 9,000 or 18,000 frames) were first resampled to  
819 1 px/μm before motion-correcting the red static channel us-  
820 ing NormCorre piecewise rigid (parameters: *max\_shifts* =  
821 40, *num\_frames\_split* = 2000, *overlaps* = 46, *splits\_els* =  
822 4, *strides* = 255). The motion-corrected red channel image  
823 was then averaged over t and used for later identification  
824 of mCherry-positive components. Motion correction vectors  
825 were then applied on the dynamic green channel before us-  
826 ing constrained non-negative matrix factorization (CNMF)  
827 for cell segmentation. Resulting traces were detrended and  
828 deconvolved before filtering spatiotemporal components us-  
829 ing quality criteria followed by identity- and behavior-blind  
830 manual curation based on visual inspection of spatial and  
831 temporal footprints and the quality of deconvolution. To  
832 identify mCherry-positive components, resulting spatial foot-  
833 prints were overlaid over the red channel average and a dy-  
834 namic threshold applied to visually match the optimal signal  
835 discovery.

836 **Place field analysis.** Continuous belt positions were binned  
837 into 45 bins of 8 cm length. For calcium signals, de-  
838 convolved events were used to avoid differential effects of  
839 GCaMP6s calcium signal tails at different animal velocities  
840 across space. Only time points with a velocity >2 cm/s were  
841 considered for spatial tuning analysis. Spatial information

842 (SI) was calculated as follows (47):

$$SI = \sum_i o_i a_i \log_2(a_i/\bar{a}) \quad (1)$$

843 where  $i$  denotes the  $i$ -th spatial bin,  $o_i$  is the animal's occu-  
844 pancy at spatial bin  $i$ ,  $a_i$  is the mean of deconvolved events at  
845 spatial bin  $i$ , and  $\bar{a}$  is the overall mean calcium activity. Place  
846 cells were defined as cells whose SI was higher than the 95th  
847 percentile of 1000x randomly position-shuffled SI values (see  
848 ref (65)). Each shuffle consisted of randomly circularly shift-  
849 ing the activity time course by at least 500 frames, segment-  
850 ing the activity in  $n$  blocks that were randomly permuted.  $n$   
851 was automatically chosen for each session to match approx-  
852 imately twice the number of laps run to account for running  
853 differences between animals. The resulting shuffled trace was  
854 then used to calculate SI as above. Spatial information rate  
855 in bits per second was calculated by multiplying SI with the  
856 average firing rate during times of movement ( $>2$  cm/s). Fir-  
857 ing rate was defined as the number of deconvolved calcium  
858 events  $>0$  per second. Sparsity was calculated according to  
859 ref (48), using the same denotation as above:

$$\text{Sparsity} = \frac{(\sum o_i a_i)^2}{(\sum o_i a_i^2)} \quad (2)$$

860 Place field reliability was calculated as the fraction of laps in  
861 which the maximum spatially binned deconvolved calcium  
862 activity occurred within the cell's place field.  $\Delta$ in-out place  
863 field activity was defined as the average deconvolved calcium  
864 event activity within a cell's place field subtracted by that  
865 activity outside the place field. Place fields were obtained  
866 by first averaging deconvolved calcium event activity at ve-  
867 locities  $>2$  cm/s per 45 spatial bins, replicating the result-  
868 ing trace by a factor of two to account for circularity of the  
869 belt, and applying a Savitzky-Golay filter (using Scipy's *sav-*  
870 *gol* function with a window of 5 frames at the second order  
871 polynomial) to account for skewed place field activity. The  
872 resulting filtered spatial calcium activity was then searched  
873 for peaks using Scipy's *find\_peaks* function (*width*: 1 frame;  
874 *prominence*: 1.5 standard deviations; *relative height*: 0.8),  
875 with the most prominent peak used as primary place field and  
876 left/right interpolated intersection points as place field begin-  
877 ning/end. Place fields that would stretch into the replicated  
878 positions were translated back to the original 45 spatial bins.  
879 Place field boundary ratio was calculated as segmenting po-  
880 sition bins into texture transition or middle zones, depending  
881 on their proximity to a texture transition, and calculating the  
882 ratio of place field beginnings/ends in a transition zone over  
883 those in a middle zone. To compare this ratio with a shuf-  
884 fled distribution, all place fields underwent 1000 iterations of  
885 randomly circularly shifting both beginnings and ends simul-  
886 taneously and saving the resulting ratio both cell populations  
887 after each iteration. Place field centers were defined as the  
888 center of mass (COM) of significantly spatially modulated  
889 neurons (see above). For this, calcium activity at velocities  
890  $>2$  cm/s per 45 spatial bins was transformed to polar coor-  
891 dinates with  $q$  as position bin and  $r$  as average deconvolved  
892 calcium event activity at that position (see also ref (65)). The

two-dimensional centroid was calculated, and the resulting 893  
angle transformed back to belt position to yield the place field 894  
center. "Place fields near reward zone" refers to place cells 895  
with COMs in either the anticipation zone (starting 30 cm 896  
before reward zone) or reward zone. 897

**Decoding of reward and anticipation zones.** For decod- 898  
ing of reward and anticipation zones, all non-zero decon- 899  
volved calcium event activity was normalized into quantiles. 900  
Position and calcium activity were only considered from time 901  
points with velocity  $>2$  cm/s. Data were downsampled to 902  
1 Hz by accumulating calcium activity and averaging posi- 903  
tion data. Positions in the 30 cm reward zone or the preced- 904  
ing 30 cm anticipation zone were binarized (1 inside zone, 905  
0 outside zone). Models were trained using calcium data 906  
of either (non-)projecting or (non-)conjunctive neurons and 907  
100 randomly sample size-matched neurons of the respec- 908  
tively larger population, ultimately using the average  $R^2$  of 909  
the random sampling procedure. Neurons with fewer than 10 910  
time bins of non-zero calcium activity in train/test datasets 911  
were excluded from training/testing of the model. A linear 912  
support vector machine (SVM) classifier (Sklearn's *linear\_* 913  
*model.SGDClassifier* function; *loss*: hinge, *penalty*: L2) 914  
was cross-validated by training on even laps and testing on 915  
odd laps, and vice versa, using the average of the resulting 916  
 $R^2$ . For models comparing (non-)projection neurons only 917  
imaging sessions with  $>10$  projection neurons were included. 918

**Velocity and lick coding.** Velocity modulation was as- 919  
sessed by linear regression of each neuron's average decon- 920  
volved calcium event activity against 1 cm/s velocity bins 921  
from 2 up to 30 cm/s using Scipy's *stats.linregress* func- 922  
tion (see also ref (56)). Cells were considered to be signif- 923  
icantly velocity modulated at  $P_{\text{adjusted}} < 0.05$  after correct- 924  
ing for false discovery rate by using Benjamini/Hochberg cor- 925  
rection. Significantly velocity modulated cells with positive 926  
slopes were termed "speed-excited" and those with negative 927  
slopes "speed-inhibited". To assess population-level appet- 928  
itive/consummatory lick modulation, average deconvolved 929  
calcium activity before and after each lick event (see above 930  
for definition) were compared within the respectively de- 931  
scribed time windows. For single-cell level appetitive lick 932  
modulation analysis, each neuron's average pre/post decon- 933  
volved calcium activity was compared across events using 934  
Wilcoxon's non-parametric paired test. Cells were classified 935  
as "licking-excited" if they were significantly modulated and 936  
showed a positive difference, or "licking-inhibited" if they 937  
showed a significant negative difference. 938

**Generalized linear model.** To determine cellular coding of 939  
space, velocity, and licking, we used a generalized linear 940  
model to predict each neuron's calcium activity. We nor- 941  
malized calcium activity by dividing each neuron's decon- 942  
volved calcium events by their signal-to-noise ratio and the 943  
resulting standard deviation. Normalized calcium activity 944  
was then smoothed using a Gaussian window of 0.5 sec- 945  
onds ( $SD = 2$ ) and temporally downsampled by averaging 946  
to 3 Hz. Finally, downsampled non-zero calcium data were 947

948 normalized into quintiles. The feature matrix consisted of  
949 normalized position, velocity, and lick data. Position data  
950 were binned into 45 equally sized spatial bins (8 cm each)  
951 and median-averaged to 3 Hz, used as factors. Velocity data  
952 were normalized by dividing data by its mean and averaging  
953 to 3 Hz. Lick bouts were calculated as described above.  
954 Appetitive lick bouts were defined as all lick bouts occur-  
955 ring up to 5 seconds before and at least 5 seconds after re-  
956 ward dispensation. Appetitive lick bouts were downsampled  
957 by median-averaging to 3 Hz. Both downsampled velocity  
958 and downsampled licking (appetitive lick bouts) were repli-  
959 cated with time shifts spanning 3 seconds before to 3 sec-  
960 onds after original timing at 3 Hz to account for anticipatory  
961 or delayed calcium activity. Generalized linear Poisson mod-  
962 els were trained, validated and tested using Python's H2O  
963 library (*H2OGeneralizedLinearEstimator*;  $\lambda$ : 0) with  
964 a train/validation/test ratio of 0.8/0.1/0.1. The resulting  $R^2$   
965 score based on the test dataset was saved and compared to  
966 that of randomly shuffled feature models. For each predic-  
967 tor group (position, velocity, licking), 100 shuffled models  
968 were generated by circularly shifting the respective group's  
969 data randomly between 200 and 700 time points, saving each  
970 model's  $R^2$  score. Significant predictors for each neuron's  
971 calcium activity were defined as those whose random shuf-  
972 fling procedure resulted in reductions in  $R^2$  for more than 95  
973 % of cases. This means that at least 96 of the 100 models with  
974 one randomly shuffled predictor group had to have decreased  
975  $R^2$  values compared to the full model, in order for this predic-  
976 tor to be considered significant. Conjunctive-coding neurons  
977 were defined as those with at least two significant predictor  
978 groups.

979 **Infrared camera recordings analysis.** Markerless pose  
980 estimation (Deep Graph Pose (92) and DeepLabCut (93)) was  
981 used to detect facial and body movements for both types of  
982 videos. For this, a deep neural network was trained to auto-  
983 matically discriminate 15 markers for videos of the body  
984 (paw, tail and head segments) and 13 markers for videos of  
985 the face (6 for pupil, eye, nose, mouth, etc). The network was  
986 trained on a large variety of lighting conditions and angles  
987 until it reached satisfactory performance. Mouth facial re-  
988 gions of interest (ROIs) were automatically segmented using  
989 video-averaged marker points of nose tip, the eye's tear duct  
990 and the mouth as stable landmarks. Mouth motion energy  
991 was calculated as the ROI's average pixel-by-pixel intensity  
992 differences from  $t_{-1}$  to  $t_0$ , and  $z$ -scoring the resulting activ-  
993 ity.

994 **Statistical analysis.** Statistical analysis was performed us-  
995 ing Python's pingouin library. Statistical tests are indicated  
996 in the figure legends and text. To evaluate statistical signif-  
997 icance, data from Figures 1D and 3F was subjected to one-  
998 or two-way ANOVAs. Data in Figures 2D, 4D, 4H, 5H-I,  
999 7B, 7D, 7F, 8B-C, and 8E was subjected to chi-square tests.  
1000 Data in Figures 2E-H was subjected to Welch's  $t$ -tests. Data  
1001 in Figures 3C-D was subjected to bootstrapping analysis (see  
1002 above) and chi-square tests. Data in Figure 3G and 8G was  
1003 subjected to Wilcoxon's test for nonparametric data. Data in

Figure 5C was subjected to a repeated-measures ANOVA fol- 1004  
lowed by post-hoc  $t$ -tests with Bonferroni correction. Data 1005  
in Figures 6I and 6K was subjected Student's paired  $t$ -test. 1006  
For all analyses data are presented as mean  $\pm$  SEM, and the 1007  
threshold for significance was at  $p < 0.05$ . 1008

#### 1009 ACKNOWLEDGEMENTS

The authors would like to thank Janelle Pakan, Hugo Spiers, Magdalena Sauvage, 1010  
Marlene Bartos, and Thomas Mrcic-Flögel as well as the rest of the Cellular Neuro- 1011  
science Department for their insightful comments and discussions while preparing 1012  
this manuscript. In addition, the authors would like to thank Falko Fuhrmann, Pavol 1013  
Bauer, and Rüdiger Geis for their help with the treadmill setup, cranial surgery, 1014  
and two-photon imaging. The resources for all experiments were provided by the 1015  
German Center for Neurodegenerative Diseases (DZNE) in Bonn and the Leibniz 1016  
Institute for Neurobiology (LIN) in Magdeburg. The authors received funding from 1017  
the German Research Foundation (DFG) SFB grant 1089 (P.M., S.R.) and ERC 1018  
Consolidator grant Sub-D-Code (O.B., S.R.). 1019

#### 1020 AUTHOR CONTRIBUTIONS

O.B. and S.R. conceived and designed experiments. O.B. performed and analyzed 1021  
imaging experiments. O.B. and P.M. performed optogenetic experiments, O.B. ana- 1022  
lyzed these. O.B. wrote the manuscript with help from S.R. and P.M.. 1023

#### 1024 COMPETING FINANCIAL INTERESTS

The authors declare no competing financial interests. 1025

#### 1026 CODE AND DATA AVAILABILITY

Code and data will be made available upon final publication. 1027

## 1028 Bibliography

1. Natalie Biderman, Akram Bakkour, and Daphna Shohamy. What Are Memories For? The 1029  
Hippocampus Bridges Past Experience with Future Decisions. *Trends in Cognitive Sci-* 1030  
*ences*, 24(7):542–556, 2020. ISSN 1364-6613. doi: 10.1016/j.tics.2020.04.004. 1031
2. T. V. P. Bliss and T. Lomo. Long-lasting potentiation of synaptic transmission in the dentate 1032  
area of the anaesthetized rabbit following stimulation of the perforant path. *The Journal of* 1033  
*Physiology*, 232(2):331–356, 1973. ISSN 0022-3751. doi: 10.1113/jphysiol.1973.sp10273. 1034
3. William Beecher Scoville and Brenda Milner. LOSS OF RECENT MEMORY AFTER BILAT- 1035  
ERAL HIPPOCAMPAL LESIONS. *Journal of Neurology, Neurosurgery & Psychiatry*, 20(1): 1036  
11, 1957. ISSN 0022-3050. doi: 10.1136/jnnp.20.1.11. 1037
4. L.R. Squire and E.R. Kandel. *Memory: From Mind to Molecules*. Scientific American Library 1038  
series. Roberts & Company, 2009. ISBN 9780981519418. 1039
5. Per Andersen, Richard Morris, David Amaral, Tim Bliss, and John O'Keefe. *The hippocam-* 1040  
*pus book*. Oxford university press, 2006. 1041
6. J O'Keefe and L Nadel. *The Hippocampus as a Cognitive Map*, 1978. 1042
7. PE Sharp and C Green. Spatial correlates of firing patterns of single cells in the subiculum of 1043  
the freely moving rat. *Journal of Neuroscience*, 14(4):2339–2356, 1994. ISSN 0270-6474. 1044  
doi: 10.1523/jneurosci.14-04-02339.1994. 1045
8. Motosada Iwase, Takuma Kitanishi, and Kenji Mizuseki. Cell type, sub-region, and layer- 1046  
specific speed representation in the hippocampal-entorhinal circuit. *Scientific Reports*, 10 1047  
(1):1407, 2020. doi: 10.1038/s41598-020-58194-1. 1048
9. B. L. McNaughton, C. A. Barnes, and J. O'Keefe. The contributions of position, direction, 1049  
and velocity to single unit activity in the hippocampus of freely-moving rats. *Experimental* 1050  
*Brain Research*, 52(1):41–49, 1983. ISSN 0014-4819. doi: 10.1007/bf00237147. 1051
10. Edvard I. Moser, Emilio Kropff, and May-Britt Moser. Place Cells, Grid Cells, and the Brain's 1052  
Spatial Representation System. *Neuroscience*, 31(1):69–89, 2008. ISSN 0147-006x. doi: 1053  
10.1146/annurev.neuro.31.061307.090723. 1054
11. Nils Nyberg, Éléonore Duvelle, Caswell Barry, and Hugo J. Spiers. Spatial goal coding in the 1055  
hippocampal formation. *Neuron*, 2022. ISSN 0896-6273. doi: 10.1016/j.neuron.2021.12.012. 1056
12. SI Wiener, CA Paul, and H Eichenbaum. Spatial and behavioral correlates of hippocampal 1057  
neuronal activity. *The Journal of Neuroscience*, 9(8):2737–2763, 1989. ISSN 0270-6474. 1058  
doi: 10.1523/jneurosci.09-08-02737.1989. 1059
13. Emma R. Wood, Paul A. Dudchenko, R.Jonathan Robitsek, and Howard Eichenbaum. Hip- 1060  
pocampal Neurons Encode Information about Different Types of Memory Episodes Occur- 1061  
ring in the Same Location. *Neuron*, 27(3):623–633, 2000. ISSN 0896-6273. doi: 1062  
10.1016/s0896-6273(00)00071-4. 1063
14. Timothy E.J. Behrens, Timothy H. Muller, James C.R. Whittington, Shirley Mark, Alon B. 1064  
Baram, Kimberly L. Stachenfeld, and Zeb Kurth-Nelson. What Is a Cognitive Map? Orga- 1065  
nizing Knowledge for Flexible Behavior. *Neuron*, 100(2):490–509, 2018. ISSN 0896-6273. 1066  
doi: 10.1016/j.neuron.2018.10.002. 1067
15. Kenneth D. Harris, Jozsef Csicsvari, Hajime Hirase, George Dragoi, and György Buzsáki. 1068  
Organization of cell assemblies in the hippocampus. *Nature*, 424(6948):552–556, 2003. 1069  
ISSN 0028-0836. doi: 10.1038/nature01834. 1070
16. Alessandro Treves and Edmund T. Rolls. Computational analysis of the role of the 1071  
hippocampus in memory. *Hippocampus*, 4(3):374–391, 1994. ISSN 1098-1063. doi: 1072  
10.1002/hipo.450040319. 1073
17. Mark S. Cembrowski and Nelson Spruston. Heterogeneity within classical cell types is the 1074  
rule: lessons from hippocampal pyramidal neurons. *Nature Reviews Neuroscience*, 20(4): 1075  
193–204, 2019. ISSN 1471-003X. doi: 10.1038/s41583-019-0125-5. 1076
18. Ivan Soltesz and Attila Losonczy. CA1 pyramidal cell diversity enabling parallel information 1077  
processing in the hippocampus. *Nature Neuroscience*, 21(4):484–493, 2018. ISSN 1097- 1078  
6256. doi: 10.1038/s41593-018-0118-0. 1079

1080 19. S. Ciochci, J. Passecker, H. Malagon-Vina, N. Mikus, and T. Klausberger. Selective information routing by ventral hippocampal CA1 projection neurons. *Science*, 348(6234):560–563, 2015. ISSN 0036-8075. doi: 10.1126/science.aaa3245.

1082 20. Takuma Kitanishi, Ryoko Umaba, and Kenji Mizuseki. Robust information routing by dorsal subiculum neurons. *Science Advances*, 7(11):eabf1913, 2021. ISSN 2375-2548. doi: 10.1126/sciadv.abf1913.

1084 21. H.J. Groenewegen, E. Vermeulen-Van der Zee, A. te Kortschot, and M.P. Witter. Organization of the projections from the subiculum to the ventral striatum in the rat. A study using anterograde transport of Phaseolus vulgaris leucoagglutinin. *Neuroscience*, 23(1):103–120, 1987. ISSN 0306-4522. doi: 10.1016/0306-4522(87)90275-2.

1086 22. A.E. Kelley and V.B. Domesick. The distribution of the projection from the hippocampal formation to the nucleus accumbens in the rat: An anterograde and retrograde-horseradish peroxidase study. *Neuroscience*, 7(10):2321–2335, 1982. ISSN 0306-4522. doi: 10.1016/0306-4522(82)90198-1.

1088 23. Stan B. Floresco. The Nucleus Accumbens: An Interface Between Cognition, Emotion, and Action. *Annual Review of Psychology*, 66(1):25–52, 2015. ISSN 0066-4308. doi: 10.1146/annurev-psych-010213-115159.

1090 24. Francesco Mannella, Kevin Gurney, and Gianluca Baldassarre. The nucleus accumbens as a nexus between values and goals in goal-directed behavior: a review and a new hypothesis. *Frontiers in Behavioral Neuroscience*, 7:135, 2013. ISSN 1662-5153. doi: 10.3389/fnbeh.2013.00135.

1092 25. Gordon J. Mogenson, Douglas L. Jones, and Chi Yiu Yim. From motivation to action: Functional interface between the limbic system and the motor system. *Progress in Neurobiology*, 14(2-3):69–97, 1980. ISSN 0301-0082. doi: 10.1016/0301-0082(80)90018-0.

1094 26. C.M.A. Pennartz, R. Ito, P.F.M.J. Verschure, F.P. Battaglia, and T.W. Robbins. The hippocampal–striatal axis in learning, prediction and goal-directed behavior. *Trends in Neurosciences*, 34(10):548–559, 2011. ISSN 0169-2236. doi: 10.1016/j.tins.2011.08.001.

1096 27. Yukiori Goto and Patricia O'Donnell. Synchronous Activity in the Hippocampus and Nucleus Accumbens *In Vivo*. *The Journal of Neuroscience*, 21(4):RC131–RC131, 2001. ISSN 0270-6474. doi: 10.1523/jneurosci.21-04-j0003.2001.

1098 28. Carlen S. Lansink, Pieter M. Goltstein, Jan V. Lankelma, Bruce L. McNaughton, and Cyriel M. A. Pennartz. Hippocampus Leads Ventral Striatum in Replay of Place-Reward Information. *PLoS Biology*, 7(8):e1000173, 2009. ISSN 1544-9173. doi: 10.1371/journal.pbio.1000173.

1100 29. A.M. Lavoie and S.J.Y. Mizumori. Spatial, movement- and reward-sensitive discharge by medial ventral striatum neurons of rats. *Brain Research*, 638(1-2):157–168, 1994. ISSN 0006-8993. doi: 10.1016/0006-8993(94)90645-9.

1102 30. Geke E. Ploeger, Berry M. Spruijt, and Alexander R. Cools. Spatial Localization in the Morris Water Maze in Rats:: Acquisition Is Affected by Intra-Accumbens Injections of the Dopaminergic Antagonist Haloperidol. *Behavioral Neuroscience*, 108(5):927–934, 1994. ISSN 0735-7044. doi: 10.1037/0735-7044.108.5.927.

1104 31. R Ito, T W Robbins, C M Pennartz, and B J Everitt. Functional Interaction between the Hippocampus and Nucleus Accumbens Shell Is Necessary for the Acquisition of Appetitive Spatial Context Conditioning. *Journal of Neuroscience*, 28(27):6950–6959, 2008. ISSN 0270-6474. doi: 10.1523/jneurosci.1615-08.2008.

1106 32. Stéphanie Trouche, Vadim Koren, Natalie M. Doig, Tommas J. Ellenker, Mohamad El-Gaby, Vitor Lopes-dos Santos, Hayley M. Reeve, Pavel V. Perestenko, Farid N. Garas, Peter J. Magill, Andrew Sharott, and David Dupret. A Hippocampus-Accumbens Tripartite Neuronal Motif Guides Appetitive Memory in Space. *Cell*, 176(6):1393–1406.e16, 2019. ISSN 0092-8674. doi: 10.1016/j.cell.2018.12.037.

1108 33. Jonathan P. Britt, Faiza Benaliouad, Ross A. McDevitt, Garret D. Stuber, Roy A. Wise, and Antonello Bonci. Synaptic and Behavioral Profile of Multiple Glutamatergic Inputs to the Nucleus Accumbens. *Neuron*, 76(4):790–803, 2012. ISSN 0896-6273. doi: 10.1016/j.neuron.2012.09.040.

1110 34. Tara A. LeGates, Mark D. Kvarta, Jessica R. Tooley, T. Chase Francis, Mary Kay Lobo, Meaghan C. Creed, and Scott M. Thompson. Reward behaviour is regulated by the strength of hippocampus–nucleus accumbens synapses. *Nature*, 564(7735):258–262, 2018. ISSN 0028-0836. doi: 10.1038/s41586-018-0740-8.

1112 35. Nathan B. Danielson, Jeffrey D. Zaremba, Patrick Kalfosh, John Bowler, Max Ladow, and Attila Losonczy. Sublayer-Specific Coding Dynamics during Spatial Navigation and Learning in Hippocampal Area CA1. *Neuron*, 91(3):652–665, 2016. ISSN 0896-6273. doi: 10.1016/j.neuron.2016.06.020.

1114 36. Christine Grienberger and Jeffrey C. Magee. Entorhinal cortex directs learning-related changes in CA1 representations. *Nature*, 611(7936):554–562, 2022. ISSN 0028-0836. doi: 10.1038/s41586-022-05378-6.

1116 37. Hod Dana, Tsai-Wen Chen, Amy Hu, Brenda C. Shields, Caiying Guo, Loren L. Looger, Douglas S. Kim, and Karel Svoboda. Thy1-GCaMP6 Transgenic Mice for Neuronal Population Imaging *In Vivo*. *PLoS ONE*, 9(9):e108697, 2014. doi: 10.1371/journal.pone.0108697.

1118 38. Lucas Sjulson, Adrien Peyrache, Andrea Cumpelik, Daniela Cassataro, and György Buzsáki. Cocaine Place Conditioning Strengthens Location-Specific Hippocampal Coupling to the Nucleus Accumbens. *Neuron*, 98(5):926–934.e5, 2018. ISSN 0896-6273. doi: 10.1016/j.neuron.2018.04.015.

1120 39. E.T. Tabuchi, A.B. Mulder, and S.I. Wiener. Position and behavioral modulation of synchronization of hippocampal and accumbens neuronal discharges in freely moving rats. *Hippocampus*, 10(6):717–728, 2000. ISSN 1050-9631. doi: 10.1002/1098-1063(2000)10:6<717::aid-hipo1009>3.0.co;2-3.

1122 40. Michael S. Bienkowskii, Ian Bowman, Monica Y. Song, Lin Gou, Tyler Ard, Kaelan Cotter, Muye Zhu, Nora L. Benavidez, Seita Yamashita, Jaspur Abu-Jaber, Sana Azam, Darrick Lo, Nicholas N. Foster, Hourri Hintiryan, and Hong-Wei Dong. Integration of gene expression and brain-wide connectivity reveals the multiscale organization of mouse hippocampal networks. *Nature Neuroscience*, 21(11):1628–1643, 2018. ISSN 1097-6256. doi: 10.1038/s41593-018-0241-y.

1124 41. Mark S. Cembrowski, Matthew G. Phillips, Salvatore F. DiLisio, Brenda C. Shields, Johan Winnubst, Jayaram Chandrashekar, Erhan Bas, and Nelson Spruston. Dissociable Structural and Functional Hippocampal Outputs via Distinct Subiculum Cell Classes. *Cell*, 173(5):1280–1292.e18, 2018. ISSN 0092-8674. doi: 10.1016/j.cell.2018.03.031.

1126 42. Daniel A Dombeck, Christopher D Harvey, Lin Tian, Loren L Looger, and David W Tank. Functional imaging of hippocampal place cells at cellular resolution during virtual navigation. *Nature Neuroscience*, 13(11):1433–1440, 2010. ISSN 1097-6256. doi: 10.1038/nn.2648.

1128 43. Falko Fuhrmann, Daniel Justus, Liudmila Sosulina, Hiroshi Kaneko, Tatjana Beutel, Detlef Friedrichs, Susanne Schoch, Martin Karl Schwarz, Martin Fuhrmann, and Stefan Remy. Locomotion, Theta Oscillations, and the Speed-Related Firing of Hippocampal Neurons Are Controlled by a Medial Septal Glutamatergic Circuit. *Neuron*, 86(5):1253–1264, 2015. ISSN 0896-6273. doi: 10.1016/j.neuron.2015.05.001.

1130 44. Andrea Giovannucci, Johannes Friedrich, Pat Gunn, Jérémie Kalfon, Brandon L Brown, Sue Ann Koay, Jiannis Taxidis, Farzaneh Najafi, Jeffrey L Gauthier, Pengcheng Zhou, Baljit S Khakh, David W Tank, Dmitri B Chkhokskii, and Efthychios A Pnevmatikakis. CalmAn: an open source tool for scalable calcium imaging data analysis. *eLife*, 8:e38173, 2019. doi: 10.7554/eLife.38173.

1132 45. P.A. Naber and M.P. Witter. Subicular efferents are organized mostly as parallel projections: A double-labeling, retrograde-tracing study in the rat. *Journal of Comparative Neurology*, 393(3):284–297, 1998. ISSN 1096-9861. doi: 10.1002/(sici)1096-9861(199804)393:3<284::aid-cnc2>3.0.co;2-y.

1134 46. Johan Winnubst, Erhan Bas, Tiago A. Ferreira, Zhuhao Wu, Michael N. Economo, Patrick Edson, Ben J. Arthur, Christopher Bruns, Konrad Rokicki, David Schauder, Donald J. O'Brits, Sean D. Murphy, David G. Ackerman, Cameron Arshadi, Perry Baldwin, Regina Blake, Ahmad Elsayed, Mashura Hasan, Daniel Ramirez, Bruno Dos Santos, Monet Weldon, Amna Zafar, Joshua T. Dudman, Charles R. Gerfen, Adam W. Hantman, Wyatt Korff, Scott M. Sternson, Nelson Spruston, Karel Svoboda, and Jayaram Chandrashekar. Reconstruction of 1,000 Projection Neurons Reveals New Cell Types and Organization of Long-Range Connectivity in the Mouse Brain. *Cell*, 179(1):268–281.e13, 2019. ISSN 0092-8674. doi: 10.1016/j.cell.2019.07.042.

1136 47. William Skaggs, Bruce McNaughton, and Katalin Gothard. An Information-Theoretic Approach to Deciphering the Hippocampal Code. In *Advances in Neural Information Processing Systems*, volume 5. Morgan-Kaufmann, 1993.

1138 48. MW Jung, SI Wiener, and BL McNaughton. Comparison of spatial firing characteristics of units in dorsal and ventral hippocampus of the rat. *The Journal of Neuroscience*, 14(12):7347–7356, 1994. ISSN 0270-6474. doi: 10.1523/jneurosci.14-12-07347.1994.

1140 49. Steven Poulter, Sang Ah Lee, James Dachtler, Thomas J. Willis, and Colin Lever. Vector trace cells in the subiculum of the hippocampal formation. *Nature Neuroscience*, pages 1–10, 2020. ISSN 1097-6256. doi: 10.1038/s41593-020-00761-w.

1142 50. Chia-Hsuan Wang, Joseph D. Monaco, and James J. Knierim. Hippocampal Place Cells Encode Local Surface-Texture Boundaries. *Current Biology*, 30(8):1397–1409.e7, 2020. ISSN 0960-9822. doi: 10.1016/j.cub.2020.01.083.

1144 51. Regina M. Carelli. The Nucleus Accumbens and Reward: Neurophysiological Investigations in Behaving Animals. *Behavioral and Cognitive Neuroscience Reviews*, 1(4):281–296, 2002. ISSN 1534-5823. doi: 10.1177/1534582302238338.

1146 52. David Dupret, Joseph O'Neill, Barty Pleydell-Bouverie, and Jozsef Csicsvari. The reorganization and reactivation of hippocampal maps predict spatial memory performance. *Nature Neuroscience*, 13(8):995–1002, 2010. ISSN 1097-6256. doi: 10.1038/nn.2599.

1148 53. Stig A Hollup, Sturla Molden, James G Donnett, May-Britt Moser, and Edvard I Moser. Accumulation of Hippocampal Place Fields at the Goal Location in an Annular Watermaze Task. *The Journal of Neuroscience*, 21(5):1635–1644, 2001. ISSN 0270-6474. doi: 10.1523/jneurosci.21-05-01635.2001.

1150 54. Anh Son Ho, Etsuro Hori, Phuong Hong Thi Nguyen, Susumu Urakawa, Takashi Kondoh, Kunio Torii, Taketoshi Ono, and Hisao Nishijo. Hippocampal neuronal responses during signaled licking of gustatory stimuli in different contexts. *Hippocampus*, 21(5):502–519, 2011. ISSN 1050-9631. doi: 10.1002/hipo.20766.

1152 55. Debora Ledergerber, Claudia Battistin, Jan Sigurd Blackstad, Richard J. Gardner, Menno P. Witter, May-Britt Moser, Yasser Roudi, and Edvard I. Moser. Task-dependent mixed selectivity in the subiculum. *Cell Reports*, 35(8):109175, 2021. ISSN 2211-1247. doi: 10.1016/j.celrep.2021.109175.

1154 56. Emilio Kropff, James E. Carmichael, May-Britt Moser, and Edvard I. Moser. Speed cells in the medial entorhinal cortex. *Nature*, 523(7561):419–424, 2015. ISSN 0028-0836. doi: 10.1038/nature14622.

1156 57. Trevor W Robbins and Barry J Everitt. Neurobehavioural mechanisms of reward and motivation. *Current Opinion in Neurobiology*, 6(2):228–236, 1996. ISSN 0959-4388. doi: 10.1016/s0959-4388(96)80077-8.

1158 58. Nick T.M. Robinson, Lucie A.L. Descamps, Lloyd E. Russell, Moritz O. Buchholz, Brendan A. Bicknell, Georgy K. Antonov, Joanna Y.N. Lau, Rebecca Nutbrown, Christoph Schmidt-Hieber, and Michael Häusser. Targeted Activation of Hippocampal Place Cells Drives Memory-Guided Spatial Behavior. *Cell*, 183(6):1586–1599.e10, 2020. ISSN 0092-8674. doi: 10.1016/j.cell.2020.09.061. first paper showing a causal role of place cells in behaviour.

1160 59. R W Komorowski, J R Manns, and H Eichenbaum. Robust Conjunctive Item-Place Coding by Hippocampal Neurons Parallels Learning What Happens Where. *Journal of Neuroscience*, 29(31):9918–9929, 2009. ISSN 0270-6474. doi: 10.1523/jneurosci.1378-09.2009.

1162 60. Xinyu Zhao, Ching-Lung Hsu, and Nelson Spruston. Rapid synaptic plasticity contributes to a learned conjunctive code of position and choice-related information in the hippocampus. *Neuron*, 110(1):96–108.e4, 2022. ISSN 0896-6273. doi: 10.1016/j.neuron.2021.10.003.

1164 61. Stefano Fusi, Earl K Miller, and Mattia Rigotti. Why neurons mix: high dimensionality for higher cognition. *Current Opinion in Neurobiology*, 37:66–74, 2016. ISSN 0959-4388. doi: 10.1016/j.conb.2016.01.010.

1166 62. Mattia Rigotti, Omri Barak, Melissa R. Warden, Xiao-Jing Wang, Nathaniel D. Daw, Earl K. Miller, and Stefano Fusi. The importance of mixed selectivity in complex cognitive tasks. *Nature*, 497(7451):585–590, 2013. ISSN 0028-0836. doi: 10.1038/nature12160.

1168 63. Simon Musall, Matthew T. Kaufman, Ashley L. Juavinett, Steven Gluf, and Anne K. Churchland. Single-trial neural dynamics are dominated by richly varied movements. *Nature Neuroscience*, 22(10):1677–1686, 2019. ISSN 1097-6256. doi: 10.1038/s41593-019-0502-4.

1170 64. Teruhiro Okuyama, Takashi Kitamura, Dheeraj S. Roy, Shigeyoshi Itohara, and Susumu Tonegawa. Ventral CA1 neurons store social memory. *Science*, 353(6307):1536–1541, 2016. ISSN 0036-8075. doi: 10.1126/science.1247003.

1172 65. Jeffrey L. Gauthier and David W. Tank. A Dedicated Population for Reward Coding in the



- 1252 Hippocampus. *Neuron*, 99(1):179–193.e7, 2018. ISSN 0896-6273. doi: 10.1016/j.neuron.2018.06.008.
- 1253
- 1254 66. E.J. Markus, Y.L. Qin, B. Leonard, W.E. Skaggs, B.L. McNaughton, and C.A. Barnes. Interactions between location and task affect the spatial and directional firing of hippocampal neurons. *The Journal of Neuroscience*, 15(11):7079–7094, 1995. ISSN 0270-6474. doi: 10.1523/jneurosci.15-11-07079.1995.
- 1255
- 1256 67. Colin G. McNamara, Álvaro Tejero-Cantero, Stéphanie Trouche, Natalia Campo-Urriza, and David Dupret. Dopaminergic neurons promote hippocampal reactivation and spatial memory persistence. *Nature Neuroscience*, 17(12):1658–1660, 2014. ISSN 1097-6256. doi: 10.1038/nn.3843.
- 1257
- 1258 68. William E. DeCoteau, Catherine Thorn, Daniel J. Gibson, Richard Courtemanche, Partha Mitra, Yasuo Kubota, and Ann M. Graybiel. Learning-related coordination of striatal and hippocampal theta rhythms during acquisition of a procedural maze task. *Proceedings of the National Academy of Sciences*, 104(13):5644–5649, 2007. ISSN 0027-8424. doi: 10.1073/pnas.0700818104.
- 1259
- 1260 69. Marielena Sosa, Hannah R. Joo, and Loren M. Frank. Dorsal and Ventral Hippocampal Sharp-Wave Ripples Activate Distinct Nucleus Accumbens Networks. *Neuron*, 105(4):725–741.e8, 2020. ISSN 0896-6273. doi: 10.1016/j.neuron.2019.11.022.
- 1261
- 1262 70. Jeremy J. Day and Regina M. Carelli. The Nucleus Accumbens and Pavlovian Reward Learning. *The Neuroscientist*, 13(2):148–159, 2007. ISSN 1073-8584. doi: 10.1177/1073858406295854.
- 1263
- 1264 71. Eoin C. O'Connor, Yves Kremer, Sandrine Lefort, Masaya Harada, Vincent Pascoli, Clément Rohner, and Christian Lüscher. Accumbal D1R Neurons Projecting to Lateral Hypothalamus Authorize Feeding. *Neuron*, 88(3):553–564, 2015. ISSN 0896-6273. doi: 10.1016/j.neuron.2015.09.038.
- 1265
- 1266 72. Sean J. Reed, Christopher K. Lafferty, Jesse A. Mendoza, Angela K. Yang, Thomas J. Davidson, Logan Grosenick, Karl Deisseroth, and Jonathan P. Britt. Coordinated Reductions in Excitatory Input to the Nucleus Accumbens Underlie Food Consumption. *Neuron*, 99(6):1260–1273.e4, 2018. ISSN 0896-6273. doi: 10.1016/j.neuron.2018.07.051.
- 1267
- 1268 73. S. A. Taha and H. L. Fields. Encoding of Palatability and Appetitive Behaviors by Distinct Neuronal Populations in the Nucleus Accumbens. *Journal of Neuroscience*, 25(5):1193–1202, 2005. ISSN 0270-6474. doi: 10.1523/jneurosci.3975-04.2005.
- 1269
- 1270 74. Luis Prado, Jorge Luis-Islas, Osvaldo I. Sandoval, Liliana Puron, Moreno M. Gil, Alvaro Luna, Mario A. Arias-García, Elvira Galaraga, Sidney A. Simon, and Ranier Gutierrez. Activation of Glutamatergic Fibers in the Anterior NAc Shell Modulates Reward Activity in the aNacSh, the Lateral Hypothalamus, and Medial Prefrontal Cortex and Transiently Stops Feeding. *The Journal of Neuroscience*, 36(50):12511–12529, 2016. ISSN 0270-6474. doi: 10.1523/jneurosci.1605-16.2016.
- 1271
- 1272 75. CS Maldonado-Irizarry, CJ Swanson, and AE Kelley. Glutamate receptors in the nucleus accumbens shell control feeding behavior via the lateral hypothalamus. *The Journal of Neuroscience*, 15(10):6779–6788, 1995. ISSN 0270-6474. doi: 10.1523/jneurosci.15-10-06779.1995.
- 1273
- 1274 76. Ryan W. S. Wee, Karyna Mishchanchuk, Rawan AlSubaie, and Andrew F. MacAskill. Hippocampal ghrelin signalling informs the decision to eat. *bioRxiv*, page 2021.11.05.467326, 2021. doi: 10.1101/2021.11.05.467326.
- 1275
- 1276 77. David Lindenbach, Giada Vacca, Soyon Ahn, Jeremy K. Seamans, and Anthony G. Phillips. Optogenetic modulation of glutamatergic afferents from the ventral subiculum to the nucleus accumbens: Effects on dopamine function, response vigor and locomotor activity. *Behavioural Brain Research*, 434:114028, 2022. ISSN 0166-4328. doi: 10.1016/j.bbr.2022.114028.
- 1277
- 1278 78. Noriaki Koshikawa, Yasuhiro Miwa, Kazunori Adachi, Masafumi Kobayashi, and Alexander R. Cools. Behavioural effects of 7-OH-DPAT are solely due to stimulation of dopamine D2 receptors in the shell of the nucleus accumbens; jaw movements. *European Journal of Pharmacology*, 308(3):227–234, 1996. ISSN 0014-2999. doi: 10.1016/0014-2999(96)00301-9.
- 1279
- 1280 79. Emma E. Boxer, JungMin Kim, Brett Dunn, and Jason Aoto. Ventral subiculum inputs to nucleus accumbens medial shell preferentially innervate D2R medium spiny neurons and contain calcium permeable AMPARs. *bioRxiv*, page 2022.10.12.511974, 2022. doi: 10.1101/2022.10.12.511974.
- 1281
- 1282 80. Zhao Li, Zhilong Chen, Guoqing Fan, Anan Li, Jing Yuan, and Tonghui Xu. Cell-Type-Specific Afferent Innervation of the Nucleus Accumbens Core and Shell. *Frontiers in Neuroanatomy*, 12:84, 2018. ISSN 1662-5129. doi: 10.3389/fnana.2018.00084.
- 1283
- 1284 81. Mary Kay Lobo, Herbert E. Covington III, Dipesh Chaudhury, Allyson K. Friedman, HaoSheng Sun, Diane Damez-Werno, David M. Dietz, Samir Zaman, Ja Wook Koo, Pamela J. Kennedy, Ezekiel Mouson, Murtaza Mogri, Rachael L. Neve, Karl Deisseroth, Ming-Hu Han, and Eric J. Nestler. Cell Type-Specific Loss of BDNF Signaling Mimics Optogenetic Control of Cocaine Reward. *Science*, 330(6002):385–390, 2010. ISSN 0036-8075. doi: 10.1126/science.1188472.
- 1285
- 1286 82. Roberto A. Gullii, Lyndon R. Duong, Benjamin W. Corrigan, Guillaume Doucet, Sylvain Williams, Stefano Fusi, and Julio C. Martinez-Trujillo. Context-dependent representations of objects and space in the primate hippocampus during virtual navigation. *Nature Neuroscience*, 23(1):103–112, 2020. ISSN 1097-6256. doi: 10.1038/s41593-019-0548-3.
- 1287
- 1288 83. Hisham E. Atallah, Michael J. Frank, and Randall C. O'Reilly. Hippocampus, cortex, and basal ganglia: Insights from computational models of complementary learning systems. *Neurobiology of Learning and Memory*, 82(3):253–267, 2004. ISSN 1074-7427. doi: 10.1016/j.nlm.2004.06.004.
- 1289
- 1290 84. Randall C. O'Reilly and James L. McClelland. Hippocampal conjunctive encoding, storage, and recall: Avoiding a trade-off. *Hippocampus*, 4(6):661–682, 1994. ISSN 1098-1063. doi: 10.1002/hipo.450040605.
- 1291
- 1292 85. Atsushi Kikumoto and Ulrich Mayr. Conjunctive representations that integrate stimuli, responses, and rules are critical for action selection. *Proceedings of the National Academy of Sciences*, 117(19):10603–10608, 2020. ISSN 0027-8424. doi: 10.1073/pnas.1922166117.
- 1293
- 1294 86. Wenhao Dang, Russell J. Jaffe, Xue-Lian Qi, and Christos Constantinidis. Emergence of Non-Linear Mixed Selectivity in Prefrontal Cortex after Training. *The Journal of Neuroscience*, 41(35):JN–RM–2814–20, 2021. ISSN 0270-6474. doi: 10.1523/jneurosci.2814-20.2021.
- 1295
- 1296 87. Weilun Sun, Ilseob Choi, Stoyan Stoyanov, Oleg Senkov, Evgeni Ponimaskin, York Winter, Janelle M. P. Pakan, and Alexander Dityatev. Context value updating and multidimensional neuronal encoding in the retrosplenial cortex. *Nature Communications*, 12(1):6045, 2021. doi: 10.1038/s41467-021-26301-z.
- 1297
- 1298 88. Malavika Murugan, Hee Jae Jung, Michelle Park, Ellia M. Miller, Julia Cox, Joshua P. Taliatferro, Nathan F. Parker, Varun Bhawe, Hong Hur, Yupu Liang, Alexander R. Nectow, Jonathan W. Pillow, and Ilana B. Witten. Combined Social and Spatial Coding in a Descending Projection from the Prefrontal Cortex. *Cell*, 171(7):1663–1677.e16, 2017. ISSN 0092-8674. doi: 10.1016/j.cell.2017.11.002.
- 1299
- 1300 89. Gordon J. Mogenson and Mark Nielsen. A study of the contribution of hippocampal—accumbens—subpallidal projections to locomotor activity. *Behavioral and Neural Biology*, 42(1):38–51, 1984. ISSN 0163-1047. doi: 10.1016/s0163-1047(84)90412-6.
- 1301
- 1302 90. D. Gowanlock R. Tervo, Bum-Yeol Hwang, Sarada Viswanathan, Thomas Gaj, Maria Lavzin, Kimberly D. Ritola, Sarah Lindo, Susan Michael, Elena Kuleshova, David Ojala, Cheng-Chiu Huang, Charles R. Gerfen, Jackie Schiller, Joshua T. Dudman, Adam W. Hantman, Loren L. Looger, David V. Schaffer, and Alla Y. Karpova. A Designer AAV Variant Permits Efficient Retrograde Access to Projection Neurons. *Neuron*, 92(2):372–382, 2016. ISSN 0896-6273. doi: 10.1016/j.neuron.2016.09.021.
- 1303
- 1304 91. Georg Nagel, Tanjef Szellas, Wolfram Huhn, Suneel Kateriya, Nona Adeishvili, Peter Berthold, Doris Ollig, Peter Hegemann, and Ernst Bamberg. Channelrhodopsin-2, a directly light-gated cation-selective membrane channel. *Proceedings of the National Academy of Sciences*, 100(24):13940–13945, 2003. ISSN 0027-8424. doi: 10.1073/pnas.1936192100.
- 1305
- 1306 92. Anqi Wu, E. Kelly Buchanan, Matthew R. Whiteway, Michael Scharfner, Guido Meijer, Jean-Paul Noel, Erica Rodriguez, Claire Everett, Amy Norovich, Evan Schaffer, Neel Mishra, C. Daniel Salzman, Dora Angelaki, Andrés Bendesky, The International Brain Laboratory, John Cunningham, and Liam Paninski. Deep Graph Pose: a semi-supervised deep graphical model for improved animal pose tracking. *bioRxiv*, page 2020.08.20.259705, 2020. doi: 10.1101/2020.08.20.259705.
- 1307
- 1308 93. Alexander Mathis, Pranav Mamidanna, Kevin M. Cury, Taiga Abe, Venkatesh N. Murthy, Mackenzie Weygant Mathis, and Matthias Bethge. DeepLabCut: markerless pose estimation of user-defined body parts with deep learning. *Nature Neuroscience*, 21(9):1281–1289, 2018. ISSN 1097-6256. doi: 10.1038/s41593-018-0209-y.
- 1309
- 1310
- 1311
- 1312
- 1313
- 1314
- 1315
- 1316
- 1317
- 1318
- 1319
- 1320
- 1321
- 1322
- 1323
- 1324
- 1325
- 1326
- 1327
- 1328
- 1329
- 1330
- 1331
- 1332
- 1333
- 1334
- 1335
- 1336
- 1337

## 1370 **Supplementary videos**

1371 **Supplemental Video 1. *In vivo* dual-color two-photon**  
1372 **calcium imaging of a mouse during goal-directed nav-**  
1373 **igation.** Representative example of dual-color two-photon  
1374 calcium imaging combined with goal-directed navigation and  
1375 lick behavior. Infrared camera images show face (top left)  
1376 and body (top right) tracking. Calcium activity is shown  
1377 by overlaying denoised GCaMP6s activity (green) onto av-  
1378 erage mCherry signal (red; bottom left); traces represent de-  
1379 noised GCaMP6s activity of mCherry-negative (green) and  
1380 mCherry-positive (red; NAc-projecting) hippocampal neu-  
1381 rons (bottom right). Playback speed is 2× original speed.

1382 **Supplemental Video 2. Optogenetic stimulation in-**  
1383 **duces mouth movement.** Five representative optogenetic  
1384 stimulation trials from one experimental mouse expressing  
1385 ChR2 and one control mouse expressing EYFP only. A light  
1386 fiber in NAc stimulated excitatory hippocampal projections  
1387 by shining 473 nm laser light at times indicated by blue  
1388 squares (top) and blue traces (bottom). Optogenetic stimu-  
1389 lation repeatedly induces lick behavior and a decrease in ve-  
1390 locity in ChR2-expressing animals but not those expressing  
1391 EYFP. Playback speed equals original speed.

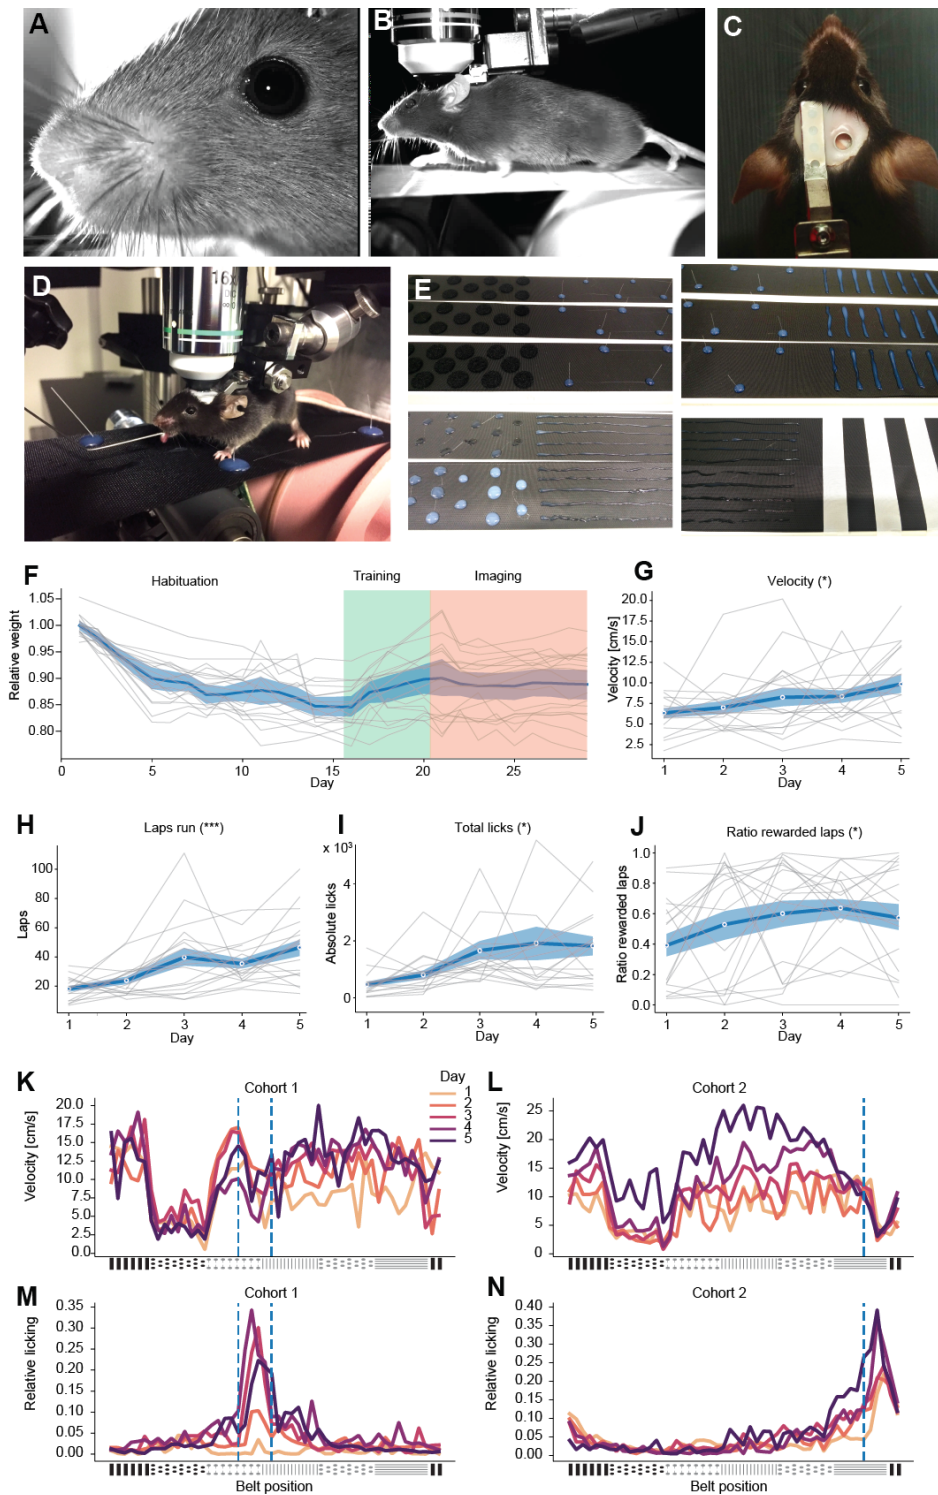

**Figure S1. Spatial reward learning task.** (A and B) Sample infrared images of face (A) and body (B) that were continuously captured at 25/75 Hz. (C) Image of one head-fixed experimental mouse from top, illustrating craniotomy and head-fixation. (D) Sample image of two-photon imaging of a head-fixed mouse on treadmill belt, licking at the lick spout. (E) Sample images of the six different belt texture zones, including Velcro dots, nylon spikes, vertical glue stripes, glue dots, horizontal glue stripes, white tape stripes (from left top to right bottom). (F) Weight changes after introduction of food restriction and during training and imaging. (G-J) Average velocity (G,  $F(4) = 2.631$ ,  $p = 0.0430$ ), number of laps run (H,  $F(4) = 8.771$ ,  $p < 0.001$ , GG-corrected), number of licks (I,  $F(4) = 3.883$ ,  $p = 0.0326$ , GG-corrected), and ratio of rewarded laps (J,  $F(4) = 3.331$ ,  $p = 0.0157$ ) increase over the course of five training days (all repeated-measures ANOVAs). Gray lines indicate data points of individual animals, blue shade represents SEM, blue line represents mean. (K-N) Average velocity (K and L) and average licking (M and N) changes across belt position and days of mice tested with reward zone in “center” of belt (K and M) and “end” of belt (L and N). Blue dashed line represents presence of reward zone.  $n = 9$  (cohort 1),  $n = 9$  (cohort 2). All data are presented as mean  $\pm$  SEM. \* $p < 0.05$ , \*\*\* $p < 0.001$ .

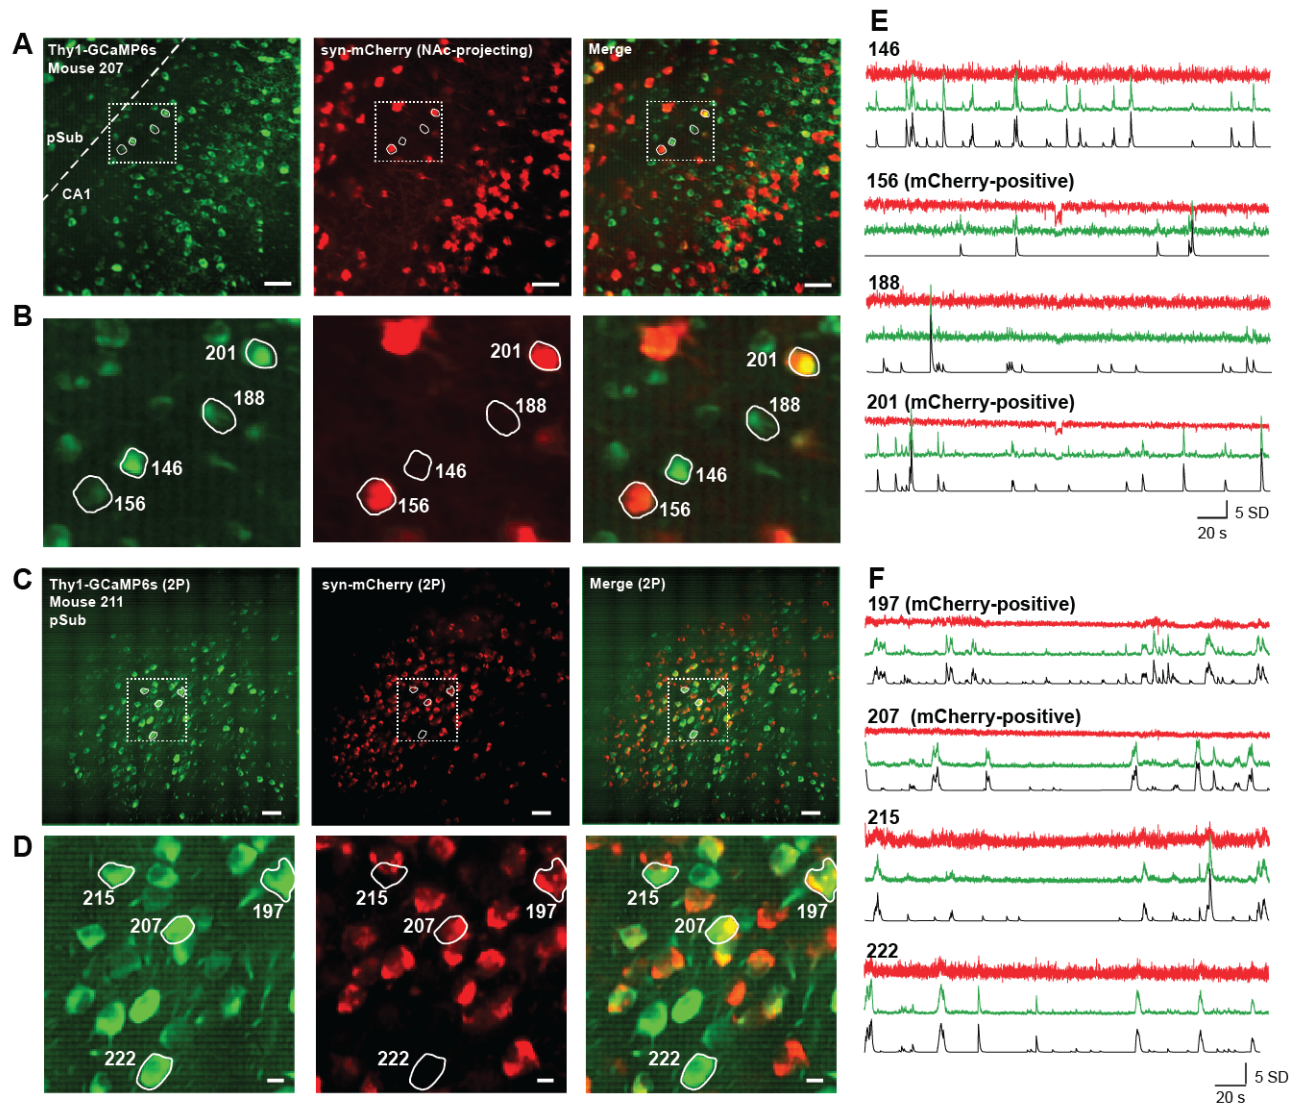

**Figure S2. *In vivo* dual-color two-photon imaging of dynamic GCaMP and static mCherry signals.** (A) Sample field of view (FOV) of one imaged region crossing putative CA1 and prosubiculum (pSub). Green channel shows GCaMP6s local correlations image, red channel shows average motion-corrected mCherry signal. (B) Detail of region in (A) clearly outlining spectrally separate channels. (C and D) Sample FOV of another region in putative prosubiculum (C) with detailed view (D). Scale bars represent 50  $\mu\text{m}$  (A and C) or 10  $\mu\text{m}$  (B and D). (E and F) Z-scored fluorescent temporal sample traces of regions of interest (ROIs) shown in (A-D). Red traces show raw fluorescence dynamics from imaging red channel, green traces show raw fluorescence dynamic from green channel, and black traces show denoised calcium signal.

Mouse: 207, session: 103,  
cells: 37 / 200

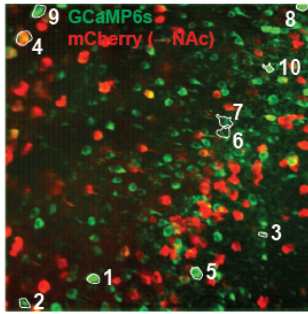

1 - SI: 1.65\*\*\*, Sp: 0.18, Rel: 0.82

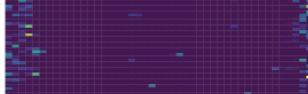

2 - SI: 1.06\*\*, Sp: 0.10, Rel: 0.88

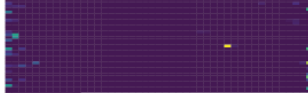

3 - SI: 0.55, Sp: 0.08, Rel: 0.91

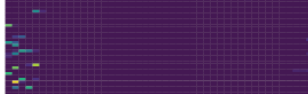

4 - SI: 0.87\*, Sp: 0.27, Rel: 0.74

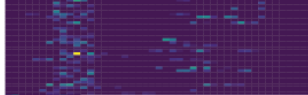

5 - SI: 1.08\*, Sp: 0.08, Rel: 0.38

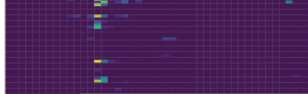

6 - SI: 0.79, Sp: 0.16, Rel: 0.44

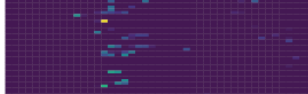

7 - SI: 0.97\*, Sp: 0.24, Rel: 0.47

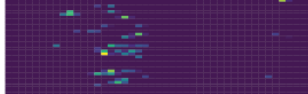

8 - SI: 0.43, Sp: 0.20, Rel: 0.32

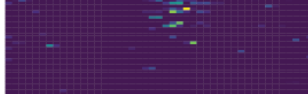

9 - SI: 3.40\*\*\*, Sp: 0.42, Rel: 0.65

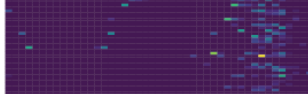

10 - SI: 1.59\*\*, Sp: 0.24, Rel: 0.85

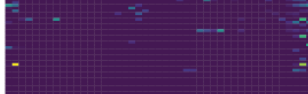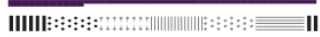

Rewarded laps: 33/35  
Avg. velocity: 20.98 cm/s

Mouse: 211, session: 152,  
cells: 79 / 156

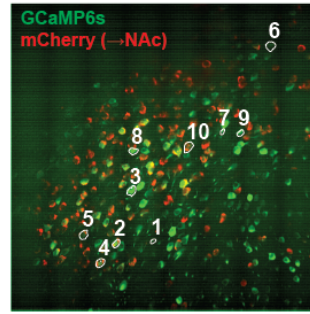

1 - SI: 1.57\*, Sp: 0.15, Rel: 0.89

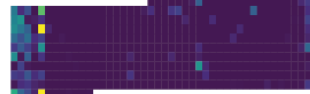

2 - SI: 4.79\*\*\*, Sp: 0.17, Rel: 0.89

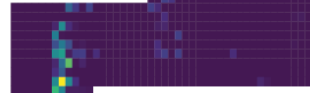

3 - SI: 6.29\*\*\*, Sp: 0.31, Rel: 0.78

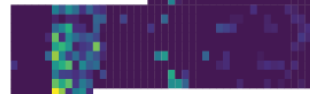

4 - SI: 2.98\*\*\*, Sp: 0.27, Rel: 0.89

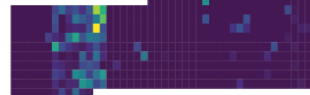

5 - SI: 2.73\*\*\*, Sp: 0.14, Rel: 0.89

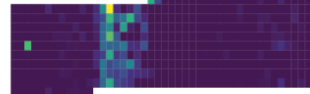

6 - SI: 1.71\*\*, Sp: 0.19, Rel: 0.78

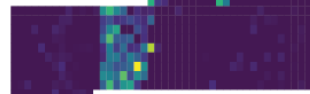

7 - SI: 1.05, Sp: 0.17, Rel: 1.00

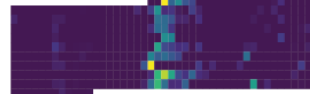

8 - SI: 1.37, Sp: 0.27, Rel: 0.89

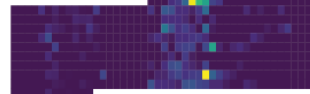

9 - SI: 1.75\*, Sp: 0.32, Rel: 0.78

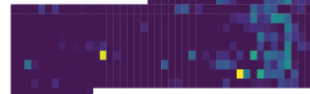

10 - SI: 1.27, Sp: 0.31, Rel: 0.78

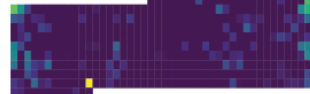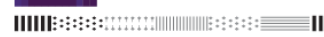

Rewarded laps: 7/10  
Avg. velocity: 5.93 cm/s

Mouse: 210, session: 137,  
cells: 18 / 255

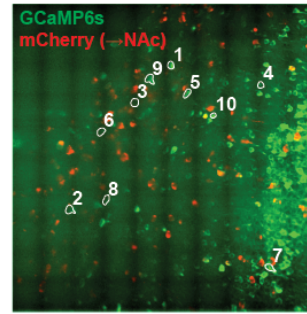

1 - SI: 2.24\*\*\*, Sp: 0.23, Rel: 0.83

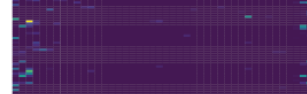

2 - SI: 1.54\*\*\*, Sp: 0.33, Rel: 0.68

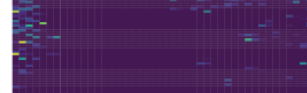

3 - SI: 0.64\*\*\*, Sp: 0.22, Rel: 0.78

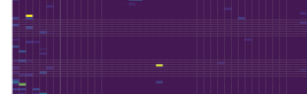

4 - SI: 0.24, Sp: 0.07, Rel: 0.10

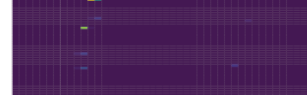

5 - SI: 0.74, Sp: 0.23, Rel: 0.46

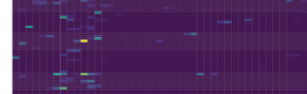

6 - SI: 1.15\*\*\*, Sp: 0.23, Rel: 0.83

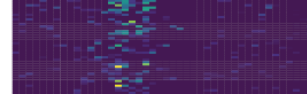

7 - SI: 0.62, Sp: 0.11, Rel: 0.49

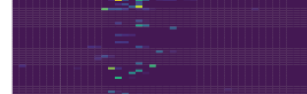

8 - SI: 0.45, Sp: 0.16, Rel: 0.29

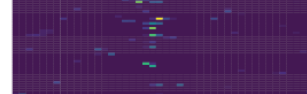

9 - SI: 2.63\*\*\*, Sp: 0.34, Rel: 0.80

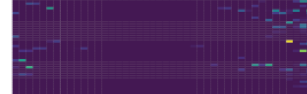

10 - SI: 1.91\*\*\*, Sp: 0.14, Rel: 0.61

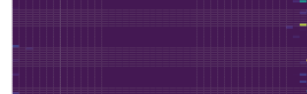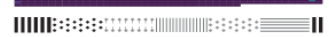

Rewarded laps: 36/42  
Avg. velocity: 25.68 cm/s

### Figure S3. Spatial tuning of different neurons in sample FOVs.

Three representative fields of view (FOVs) from three different mice are shown, with single-lap spatial calcium activity of each 10 representative neurons, some putatively NAc-projecting. FOV information is shown on top, including numbers of identified dHPC<sup>-</sup> (green) and dHPC<sup>→NAc</sup> (red) neurons. FOVs shown are composites of CalmAn maximum local correlation images (*caiman.summary\_images.max\_correlation\_image*) of GCaMP channel (green) and the averaged motion-corrected red channel with NAc-projecting mCherry fluorescence. Contours of ten representative neurons from each FOV are indicated with white outlines and numbers that refer to spatially averaged calcium activity below. Each neuron's normalized average calcium activity across 45 spatial bins per lap (y axis) is shown with key spatial information values above (SI: spatial information (47), Sp: Sparsity (48), Rel: reliability of each neuron's per-lap maximum activity to occur within the place field). Orange numbers refer to NAc-projecting neurons.

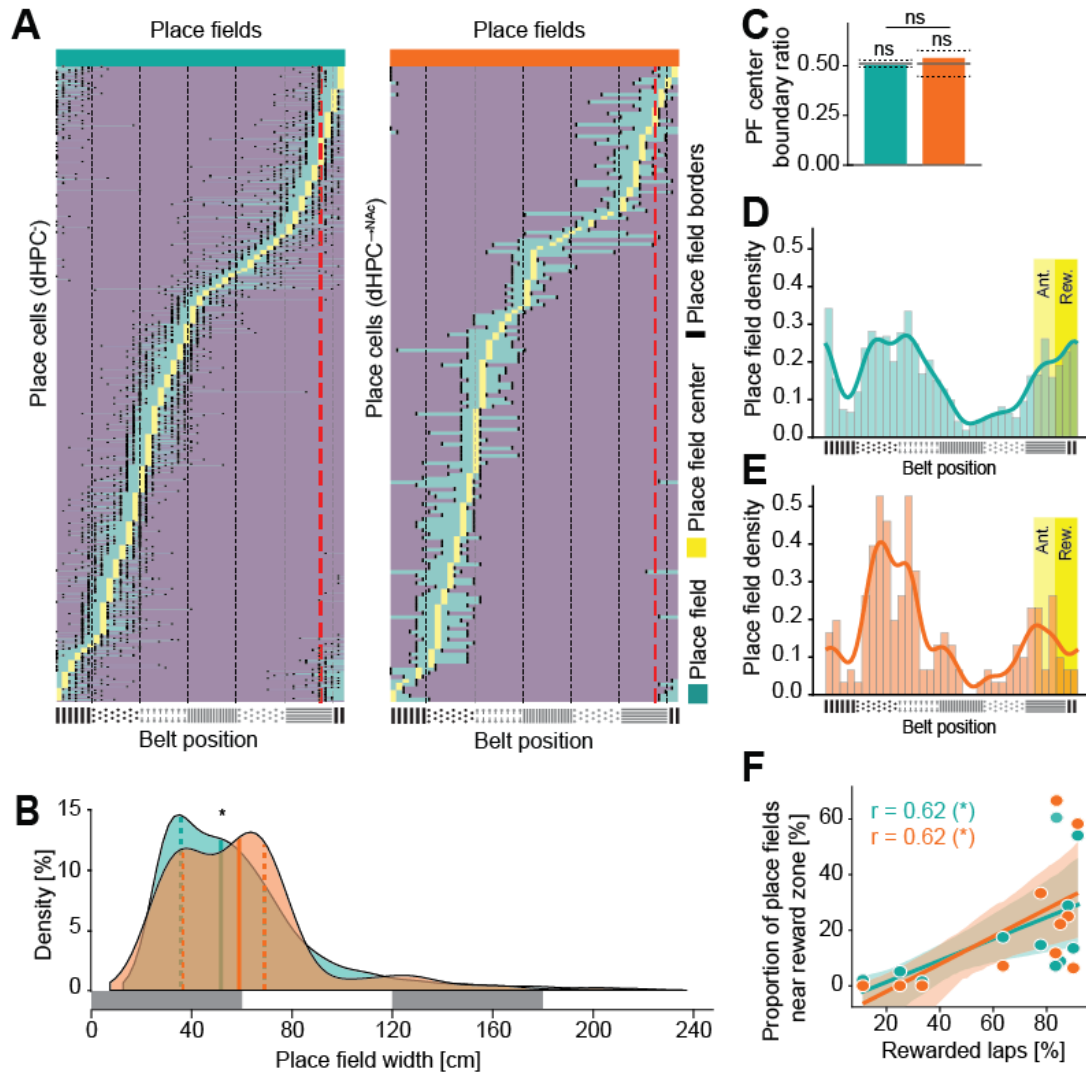

**Figure S4. Place field distribution across the belt and behavioral performance.** (A) Extent of place fields of dHPC<sup>-</sup> (left) and dHPC<sup>→NAc</sup> (right) place cells, sorted by each place cell's center of mass (COM). Turquoise represents place field, yellow represents COM, black lines represent left and right borders of place fields. Red dashed line represents beginning of reward zone, black dashed lines represent belt texture borders. (B) Width of place fields is unevenly distributed between dHPC<sup>-</sup> (green; quartiles 35.6 cm / 51.7 cm / 69.0 cm) and dHPC<sup>→NAc</sup> (red; quartiles 36.5 cm / 58.9 cm / 69.0 cm) place cells (Kolmogorov-Smirnov test,  $D = 0.116$ ,  $p = 0.0299$ ). Gray bars represent belt texture zones (60 cm). (C) Place field centers are not biased with respect to texture boundaries (percentile < 95th, permutation test) and the ratio is not different between neuronal populations ( $\chi^2(1, 5372) = 1.646$ ,  $p = 0.1995$ ). (D and E) Place field density between reward and anticipation zones compared to the rest of the belt for dHPC<sup>-</sup> (D) and dHPC<sup>→NAc</sup> (E) populations. (F) Reward and anticipation zone overrepresentation correlates with behavioral success (percentage of rewarded laps per session) for both dHPC<sup>-</sup> (green) and dHPC<sup>→NAc</sup> (red) populations (Pearson correlation;  $r_{\text{dHPC}^-} = 0.622$ ,  $p = 0.0107$ ;  $r_{\text{dHPC}^{\rightarrow\text{NAc}}} = 0.619$ ,  $p = 0.0421$ ). ns: not significant, \* $p < 0.05$ .

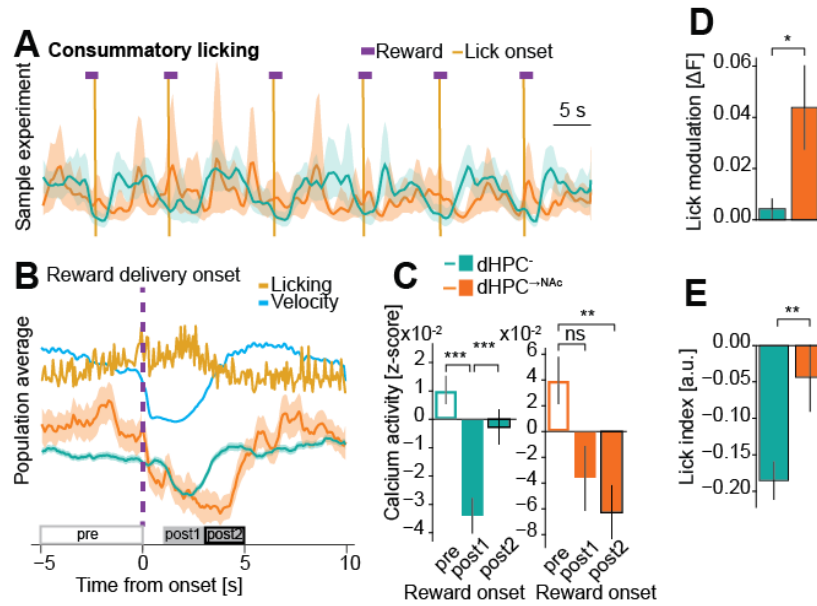

**Figure S5. Lick modulation during consumption and general licking.** (A-C) Consummatory licking leads to a depression in neural activity. (A) Sample experiment showing reward dispensation (purple bars) and consummatory licking onsets (golden vertical lines) and population calcium activity from dHPC<sup>-</sup> (green) and dHPC<sup>→NAc</sup> (red) neurons. Note the robust depression of neural activity during times of reward consumption. (B) Event-triggered average traces around reward delivery onset, including licking and speed as well as population average calcium activity of dHPC<sup>-</sup> (green) and dHPC<sup>→NAc</sup> (red) neurons. Gray rectangles indicate time windows for comparing calcium activity shown in (C). (C) Calcium activity is differentially modulated by reward onset (two-way mixed ANOVA;  $F_{\text{reward\_timing}}(2, 10740) = 19.380$ ,  $p(\text{GG-corrected}) < 0.001$ ,  $F_{\text{projection}}(1, 5370) = 0.798$ ,  $p = 0.372$ ,  $F_{\text{interaction}}(2, 10740) = 5.559$ ,  $p = 0.0039$ ). Post-hoc pairwise  $t$ -tests with Bonferroni correction were performed for each interaction and the results indicated with asterisks. (D) Lick modulation (average of each trial's pre-post difference) is significantly increased in dHPC<sup>→NAc</sup> neurons (Welch's  $t(496.11) = 2.379$ ,  $p = 0.0177$ ). (E) Lick index (average calcium activity difference during licking) is significantly increased in dHPC<sup>→NAc</sup> neurons (Welch's  $t(454.19) = 2.729$ ,  $p = 0.0066$ ). All data are presented as mean  $\pm$  SEM. \* $p < 0.05$ , \*\* $p < 0.01$ , \*\*\* $p < 0.001$ .

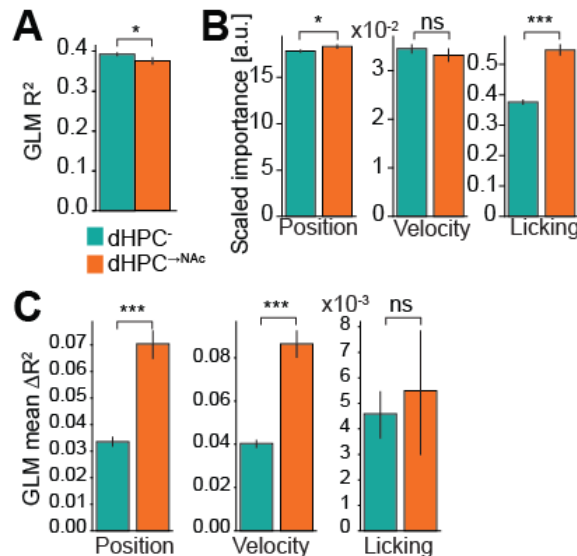

**Figure S6. Generalized linear model reveals coding differences for dHPC<sup>→NAc</sup> neurons.** (A) GLMs' explained variance  $R^2$  is significantly lower for dHPC<sup>→NAc</sup> neurons (Welch's  $t(615.15) = 2.147$ ,  $p = 0.032$ ). (B) Scaled feature importance (standardized GLM coefficients retrieved by H2O's varimp() method) is higher in dHPC<sup>→NAc</sup> neurons for position (Welch's  $t(2508.09) = 2.162$ ,  $p = 0.031$ ) and licking (Welch's  $t(1879.75) = 9.328$ ,  $p < 0.001$ ), but not for velocity (Welch's  $t(2609.15) = 0.881$ ,  $p = 0.378$ ). (C) Mean  $R^2$  differences between full and feature-shuffled models are significantly greater in dHPC<sup>→NAc</sup> neurons for position (Welch's  $t(523.23) = 5.984$ ,  $p < 0.001$ ), velocity (Welch's  $t(497.69) = 7.704$ ,  $p < 0.001$ ), but not for licking (Welch's  $t(552.63) = 0.3626$ ,  $p = 0.717$ ). All data are presented as mean  $\pm$  SEM. ns: not significant, \* $p < 0.05$ , \*\*\* $p < 0.001$ .
